# Supplementary material for: Diketopiperazine alkaloids from a mangrove rhizosphere soil derived fungus Aspergillus effuses H1-1
Source: Royal Society of Chemistry journal article supplement (doi:10.1039/c2ob26757h), 2012-01-01
Supplement: c2ob26757h.pdf [file c2ob26757h.pdf]

## SUPPORTING INFORMATION

# Diketopiperazine Alkaloids from a Mangrove Rhizosphere Soil Derived Fungus *Aspergillus effuses* H1-1

Huquan Gao,<sup>a</sup> Weizhong Liu,<sup>a,c</sup> Tianjiao Zhu,<sup>a</sup> Xiaomei Mo,<sup>a</sup> Attila Mándi,<sup>b</sup>  
Tibor Kurtán,<sup>\*b</sup> Jing Li,<sup>\*a</sup> Qianqun Gu,<sup>a</sup> and Dehai Li<sup>\*a]</sup>

<sup>a</sup> *Key Laboratory of Marine Drugs, Chinese Ministry of Education,  
School of Medicine and Pharmacy, Ocean University of China,  
Qingdao 266003, China,*

<sup>b</sup> *Department of Organic Chemistry, University of Debrecen, POB 20,  
4010 Debrecen, Hungary*

<sup>c</sup> *Department of Chemistry, Binzhou Medical College, Yantai, 264003, P.R. China*

## List of Supporting Information

---

|                                                                                                                                                  |         |
|--------------------------------------------------------------------------------------------------------------------------------------------------|---------|
| Figure S1. The HR-ESI-MS spectrum of <b>1</b> .....                                                                                              | S3      |
| Figure S2. The <sup>1</sup> H-NMR spectrum of <b>1</b> in DMSO- <i>d</i> <sub>6</sub> .....                                                      | S4      |
| Figure S3. The <sup>13</sup> C-NMR spectrum of <b>1</b> in DMSO- <i>d</i> <sub>6</sub> .....                                                     | S5      |
| Figure S4. The DEPT spectrum of <b>1</b> in DMSO- <i>d</i> <sub>6</sub> .....                                                                    | S6      |
| Figure S5. The HMQC spectrum of <b>1</b> in DMSO- <i>d</i> <sub>6</sub> .....                                                                    | S7      |
| Figure S6. The 1H-1H COSY spectrum of <b>1</b> in DMSO- <i>d</i> <sub>6</sub> .....                                                              | S8      |
| Figure S7. The HMBC spectrum of <b>1</b> in DMSO- <i>d</i> <sub>6</sub> .....                                                                    | S9      |
| Figure S8. The NOE spectrum of <b>1</b> in DMSO- <i>d</i> <sub>6</sub> .....                                                                     | S10     |
| Figure S9. The HR-ESI-MS spectrum of <b>2</b> .....                                                                                              | S11     |
| Figure S10. The <sup>1</sup> H-NMR spectrum of <b>2</b> in DMSO- <i>d</i> <sub>6</sub> .....                                                     | S12     |
| Figure S11. The <sup>13</sup> C-NMR spectrum of <b>2</b> in DMSO- <i>d</i> <sub>6</sub> .....                                                    | S13     |
| Figure S12. The DEPT spectrum of <b>2</b> in DMSO- <i>d</i> <sub>6</sub> .....                                                                   | S14     |
| Figure S13. The HMQC spectrum of <b>2</b> in DMSO- <i>d</i> <sub>6</sub> .....                                                                   | S15     |
| Figure S14. The 1H-1H COSY spectrum of <b>2</b> in DMSO- <i>d</i> <sub>6</sub> .....                                                             | S16     |
| Figure S15. The HMBC spectrum of <b>2</b> in DMSO- <i>d</i> <sub>6</sub> .....                                                                   | S17     |
| Figure S16. The NOE spectrum of <b>2</b> in DMSO- <i>d</i> <sub>6</sub> .....                                                                    | S18     |
| Table S1. Cartesian coordinates for the lowest energy reoptimized MMFF conformers<br>calculated at B3LYP/6-31G(d) level of theory in vacuo ..... | S19-S26 |

Figure S1. The HR-ESI-MS spectrum of **1**

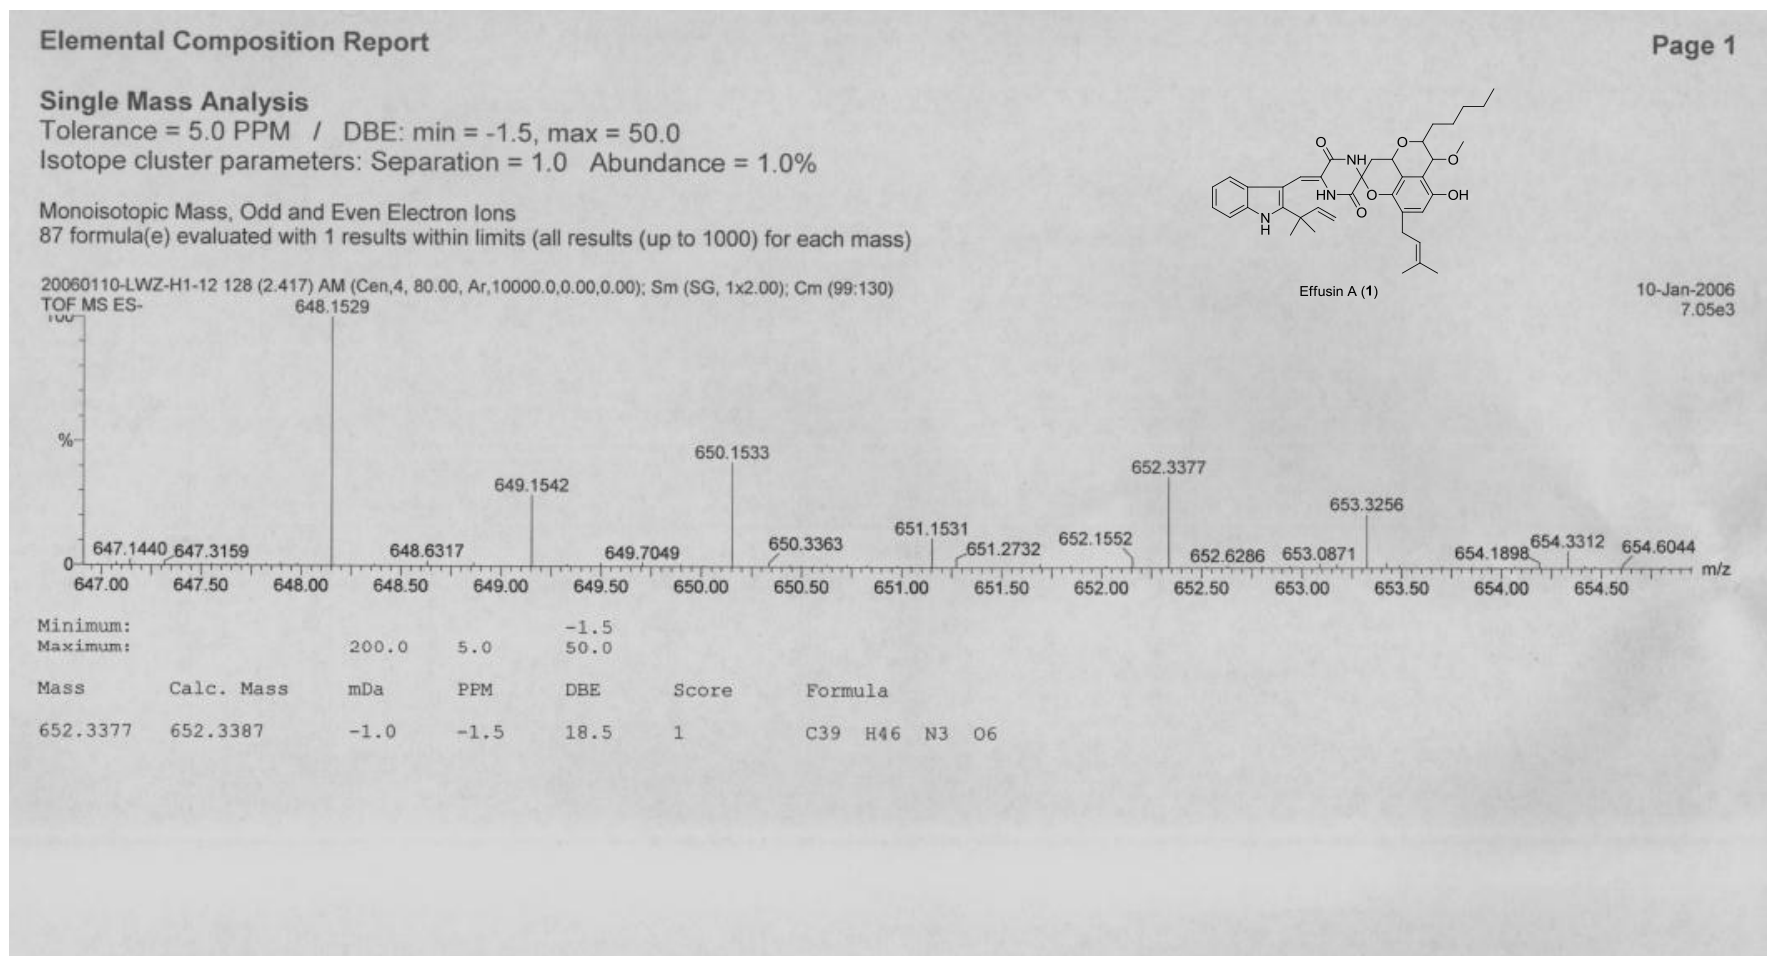

Figure S2. The <sup>1</sup>H-NMR spectrum of **1** in DMSO-*d*<sub>6</sub>

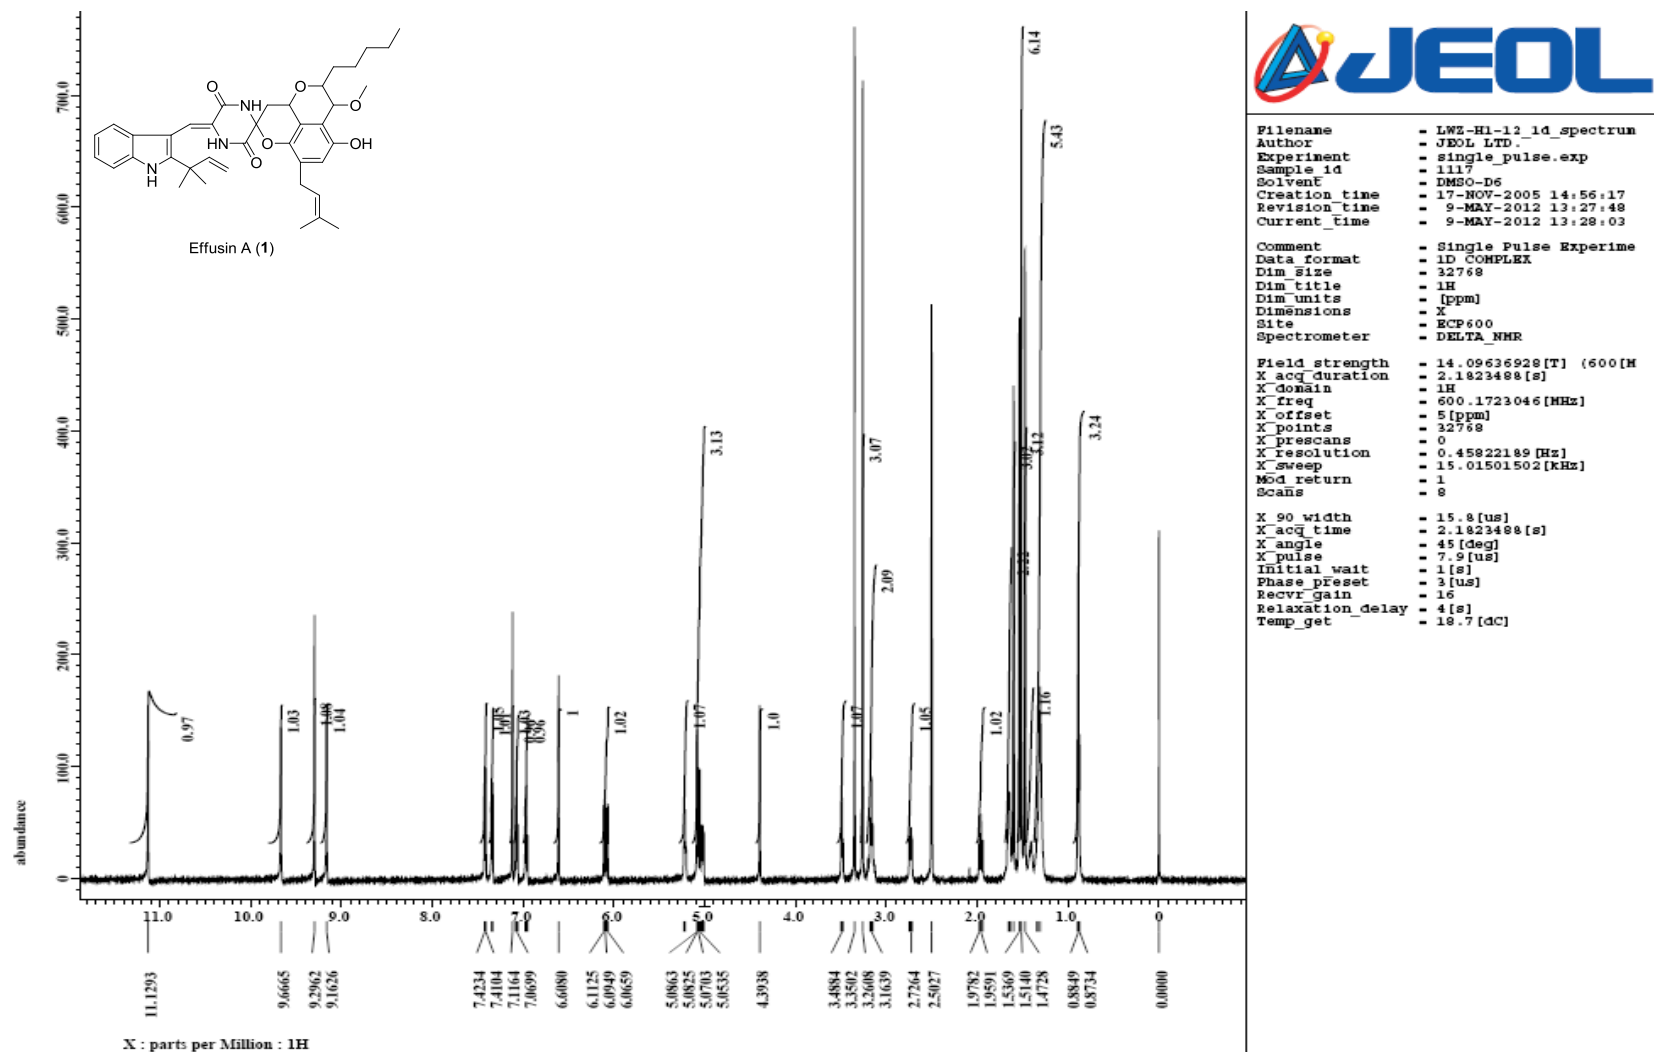

Figure S3. The  $^{13}\text{C}$ -NMR spectrum of **1** in  $\text{DMSO}-d_6$

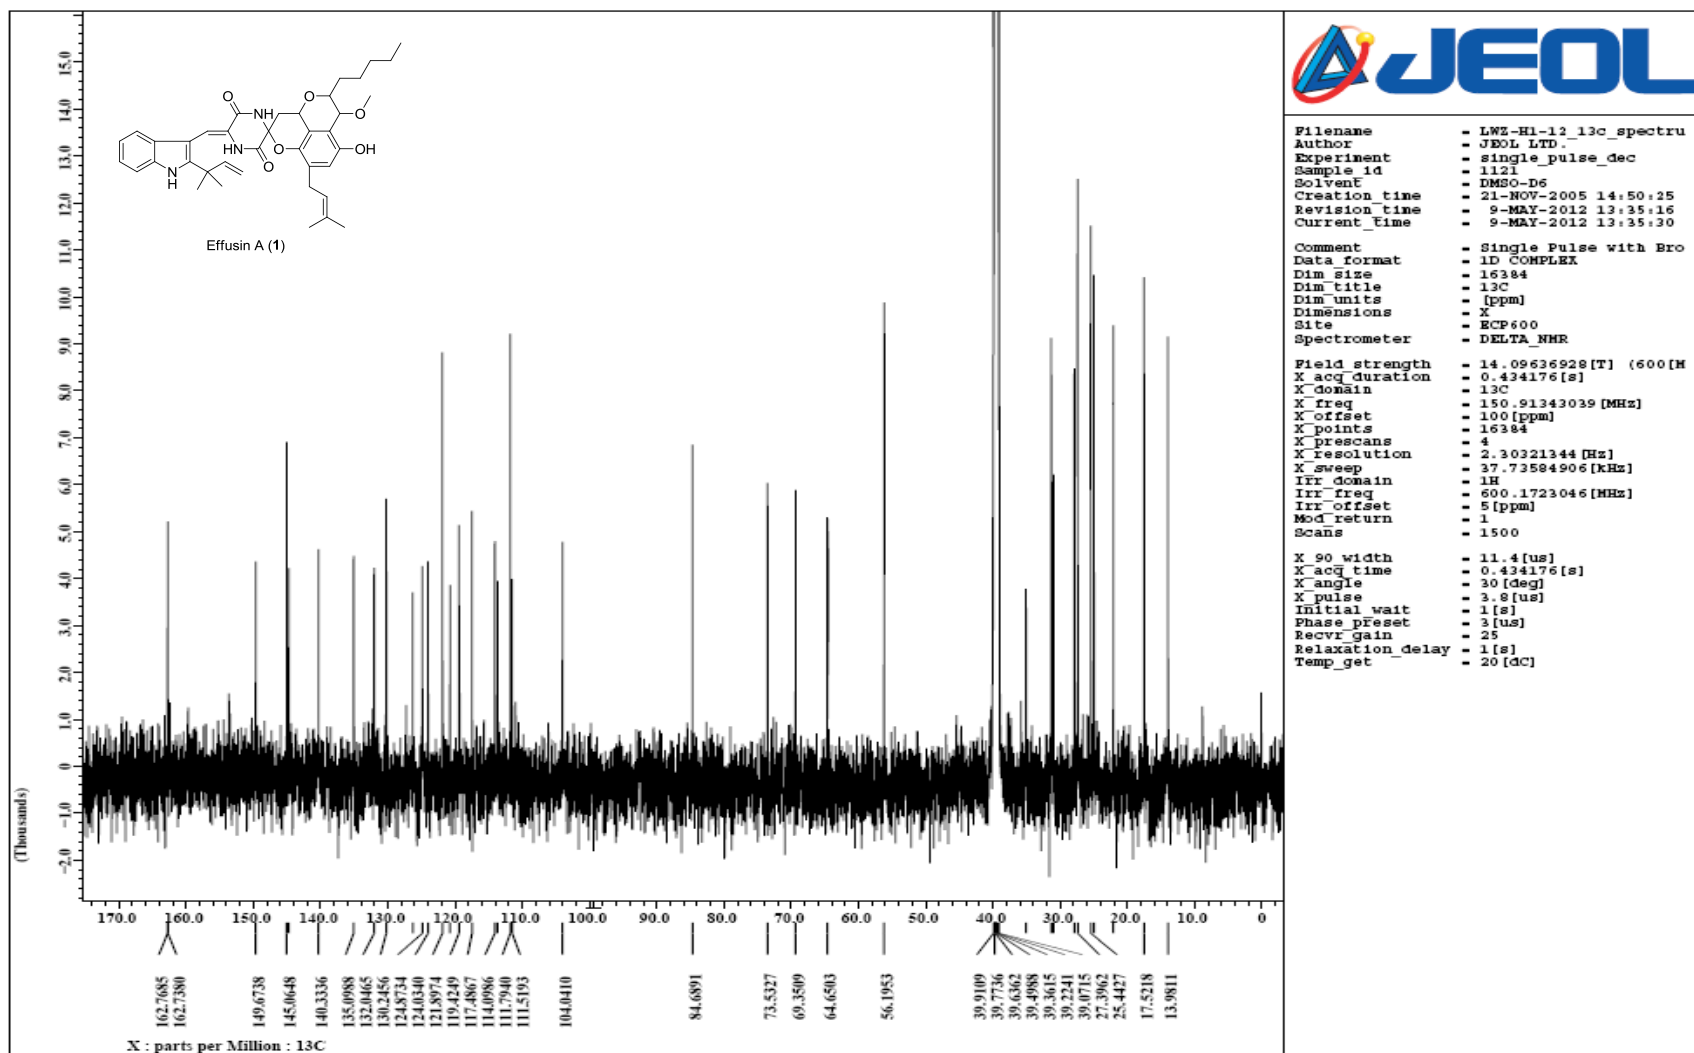

Figure S4. The DEPT spectrum of **1** in DMSO-*d*<sub>6</sub>

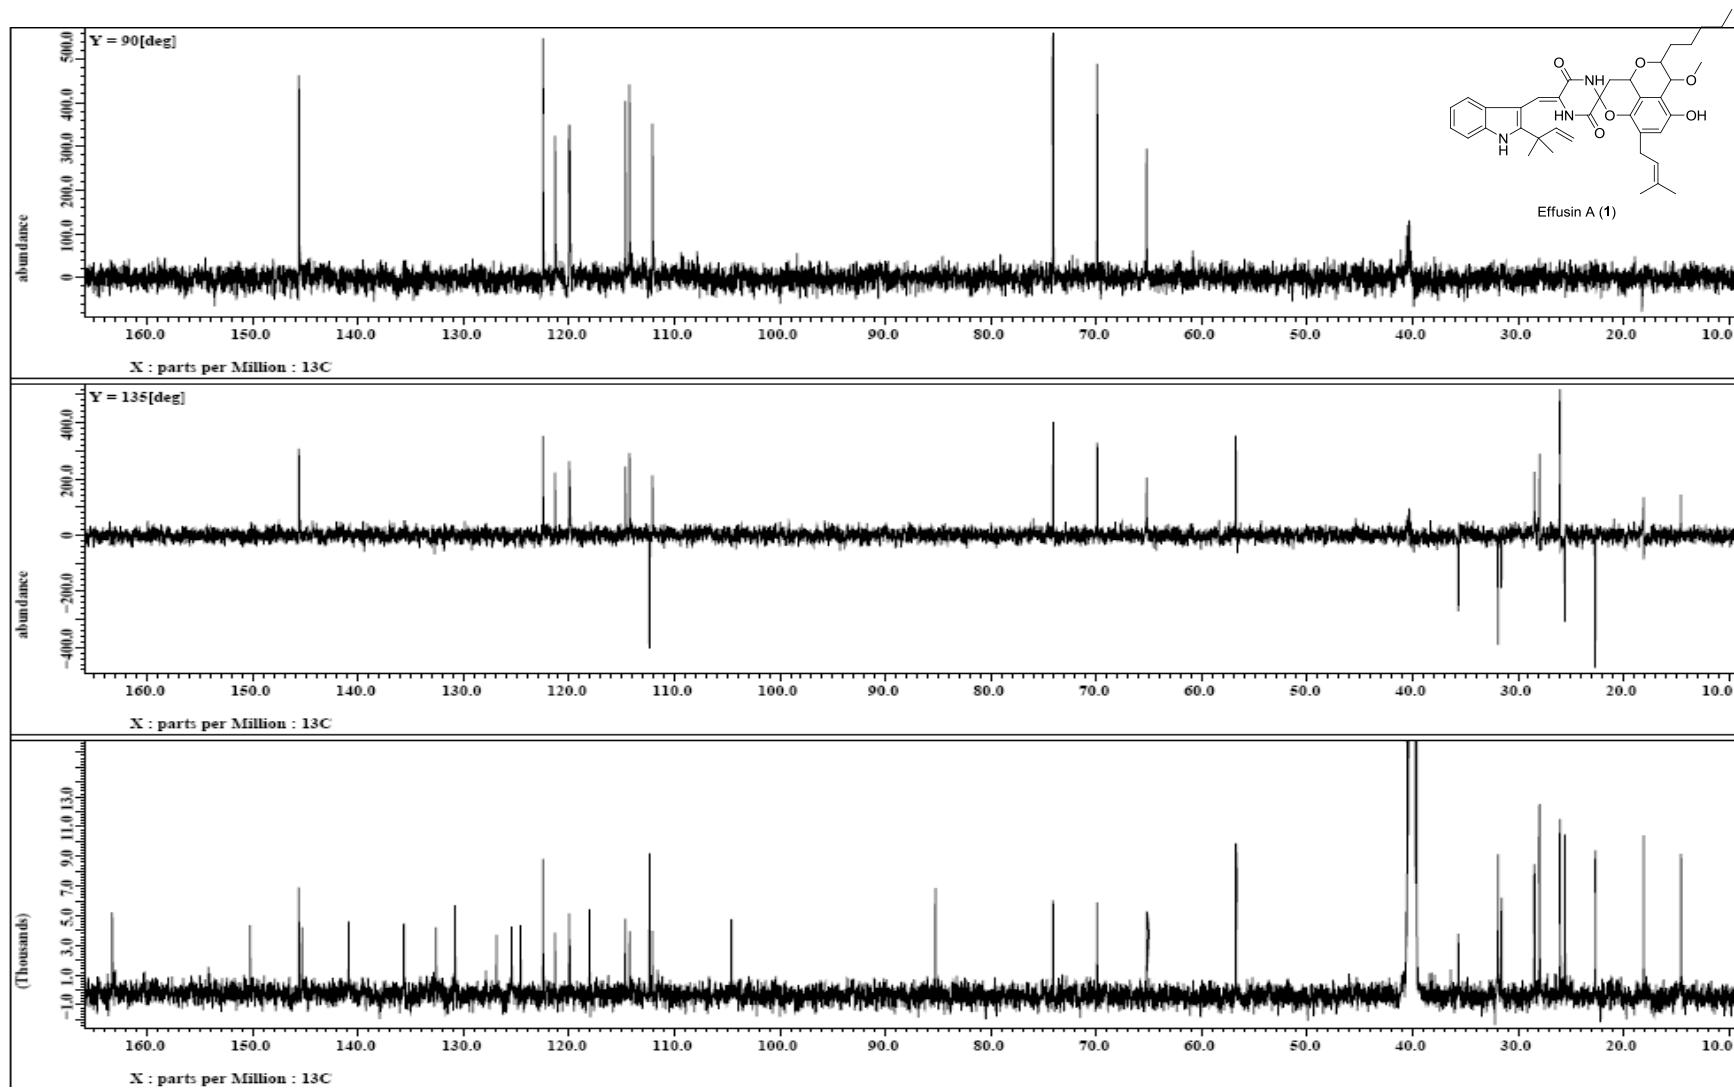

Figure S5. The HMQC spectrum of **1** in DMSO- $d_6$

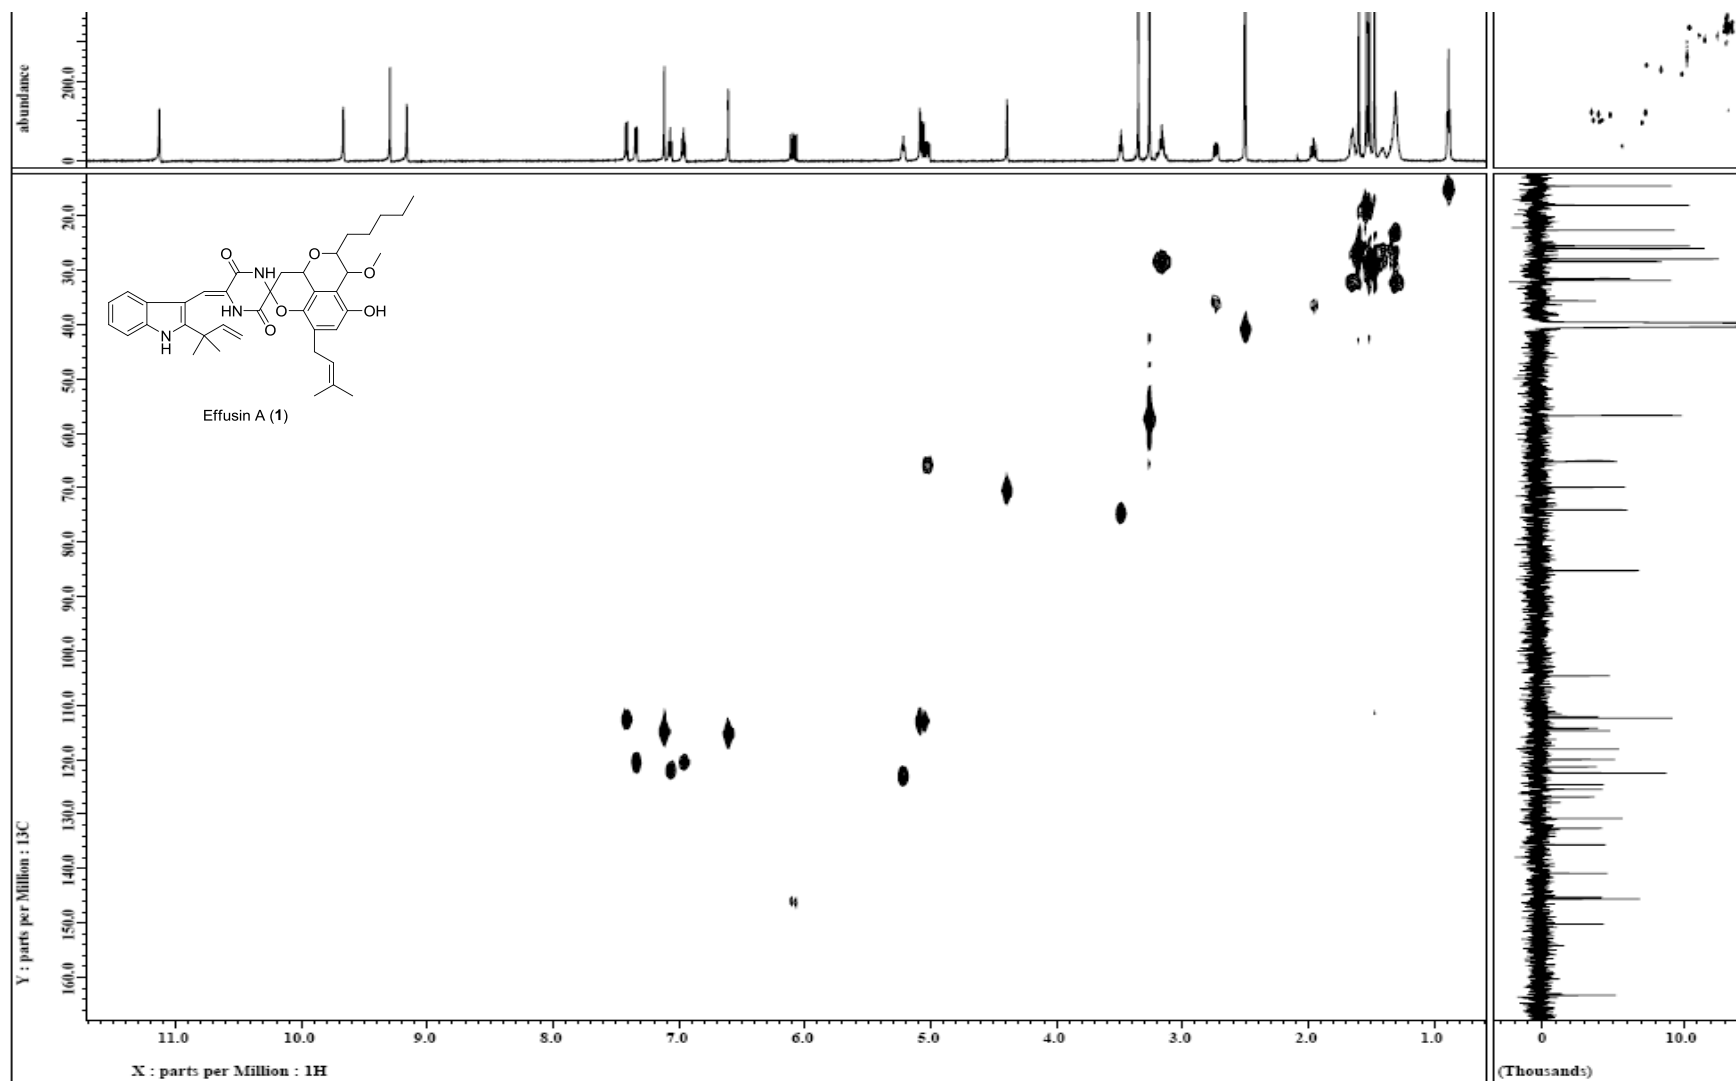

Figure S6. The  $^1\text{H}$ - $^1\text{H}$  COSY spectrum of **1** in  $\text{DMSO-}d_6$

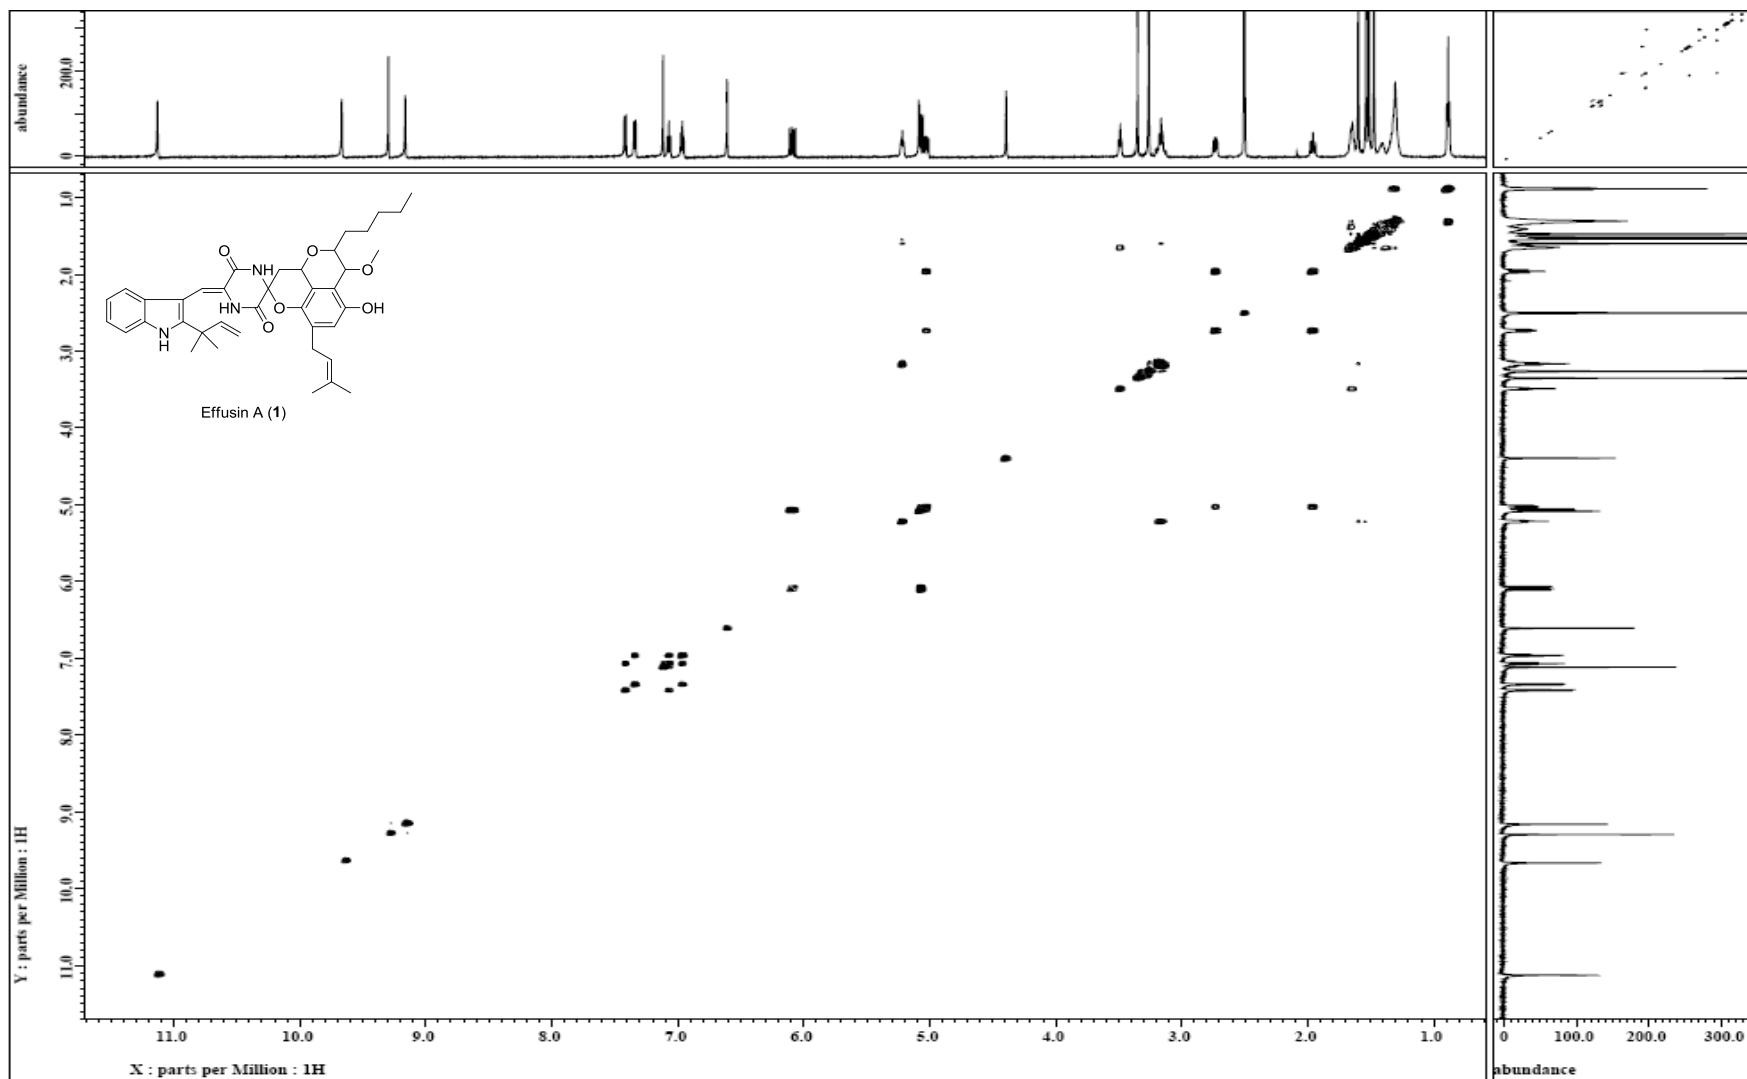



Figure S7. The HMBC spectrum of **1** in DMSO- $d_6$

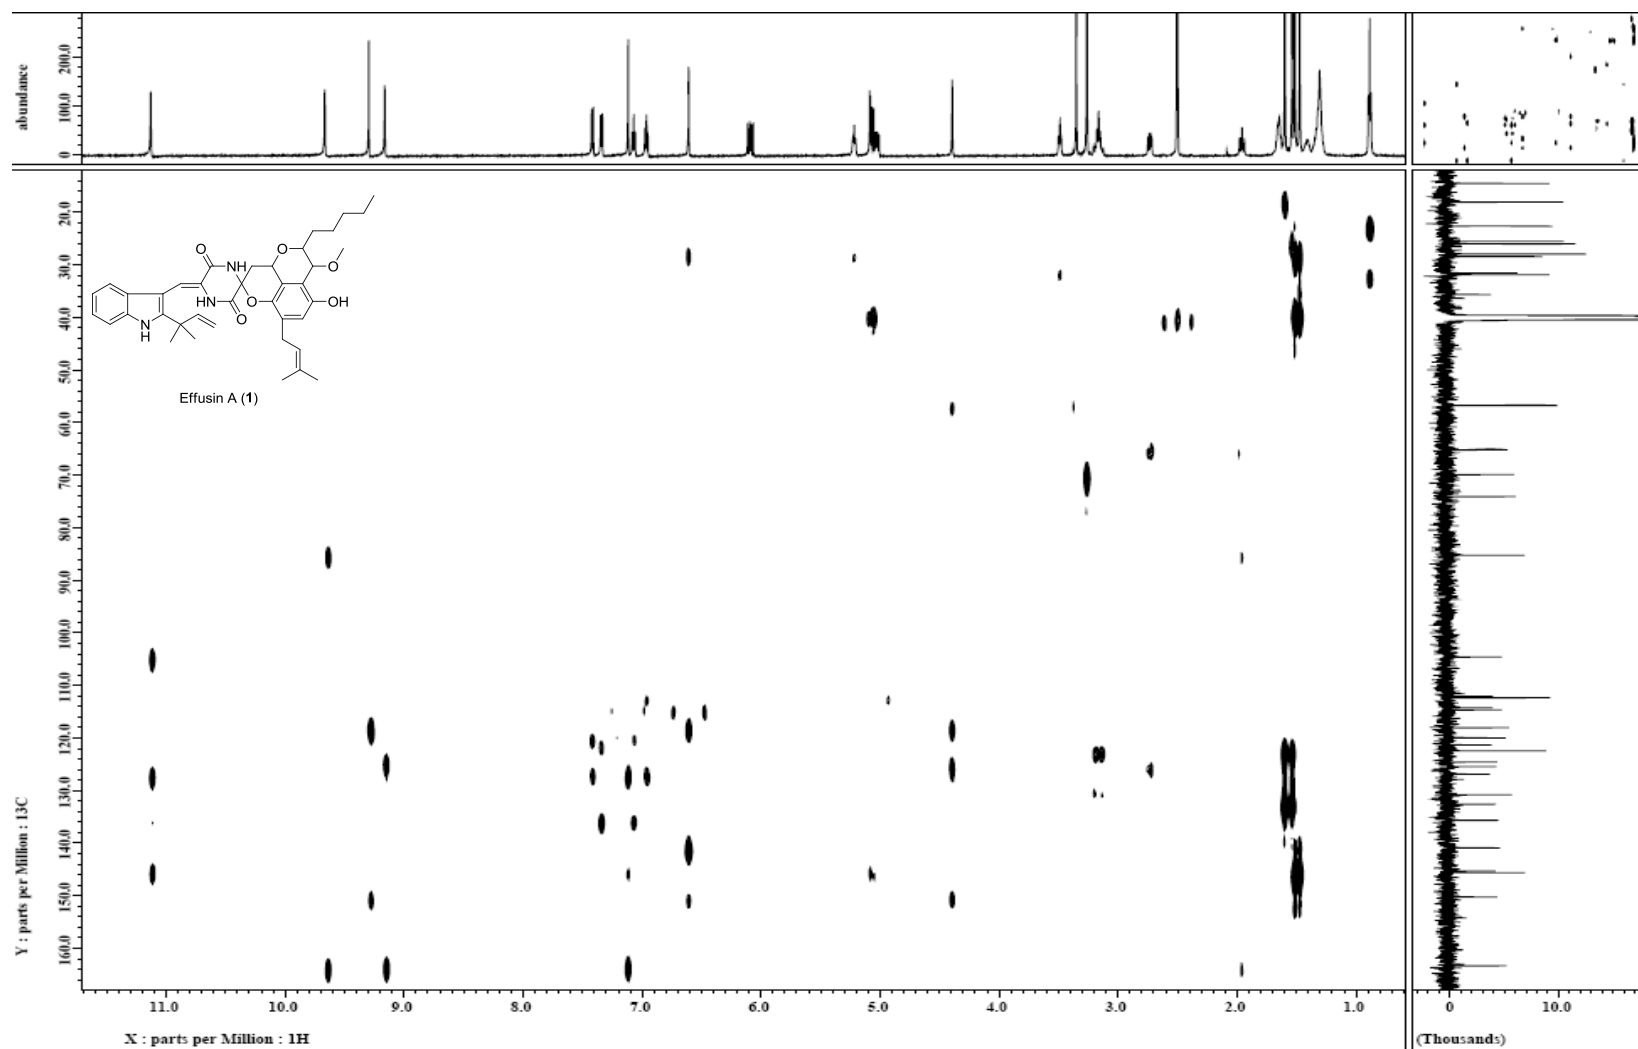

Figure S8. The NOE spectrum of **1** in DMSO- $d_6$

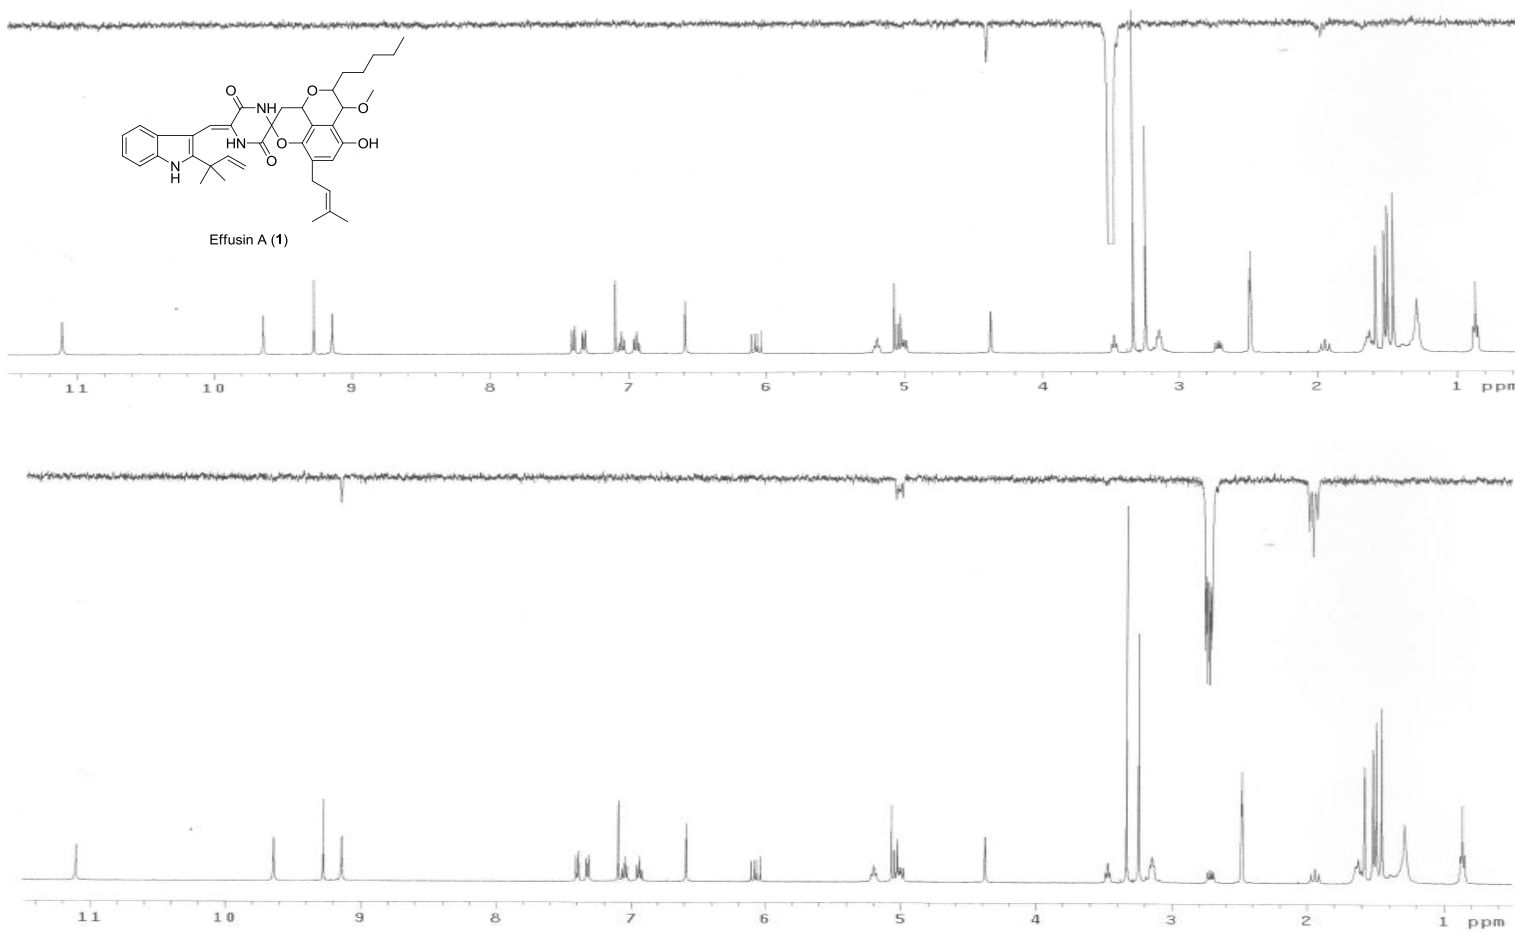

Figure S9. The HR-ESI-MS spectrum of 2

## Elemental Composition Report

### Single Mass Analysis

Tolerance = 5.0 PPM / DBE: min = -1.5, max = 50.0

Isotope cluster parameters: Separation = 1.0 Abundance = 1.0%

### Monoisotopic Mass, Odd and Even Electron Ions

1190 formula(e) evaluated with 1 results within limits (all results (up to 1000) for each mass)

LWZ-H1-16

20060110-LWZ-H1-16 113 (2.138) AM (Cen,4, 80.00, Ar,10000.0,0.00,0.00); Sm (SG, 1x2.00); Cm (95:120)

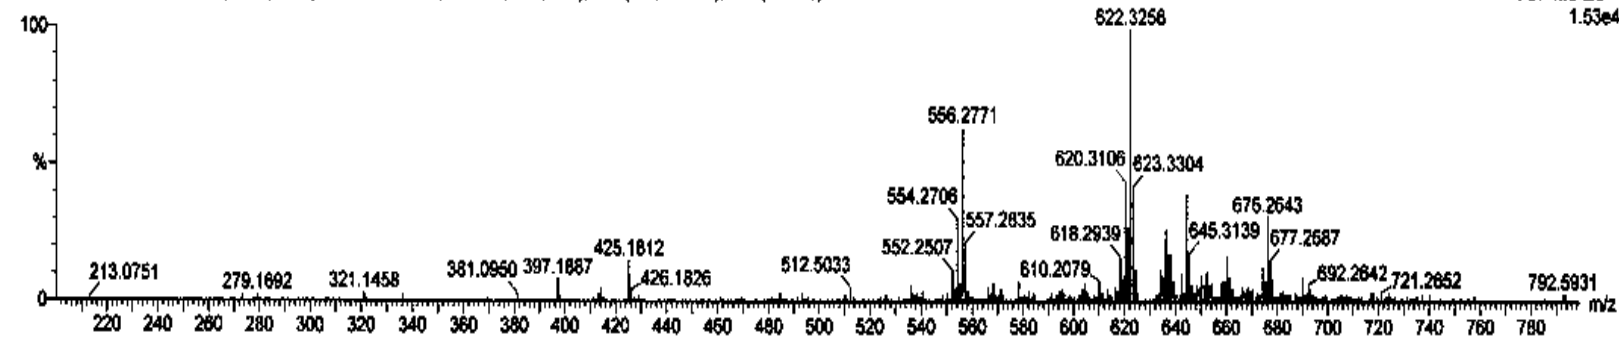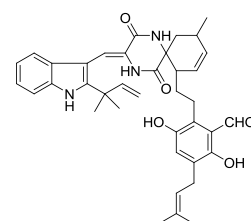

Dihydrocryptochinulin D (2)

Page 1

10-Jan-2006  
TOF MS ES+  
1.53e4

| Minimum: |            |      |      | -1.5 |       |               |
|----------|------------|------|------|------|-------|---------------|
| Maximum: | 200.0      | 5.0  |      | 50.0 |       |               |
| Mass     | Calc. Mass | mDa  | PPM  | DBE  | Score | Formula       |
| 622.3256 | 622.3281   | -2.5 | -4.0 | 18.5 | 1     | C38 H44 N3 O5 |

Figure S10. The  $^1\text{H-NMR}$  spectrum of **2** in  $\text{DMSO-}d_6$

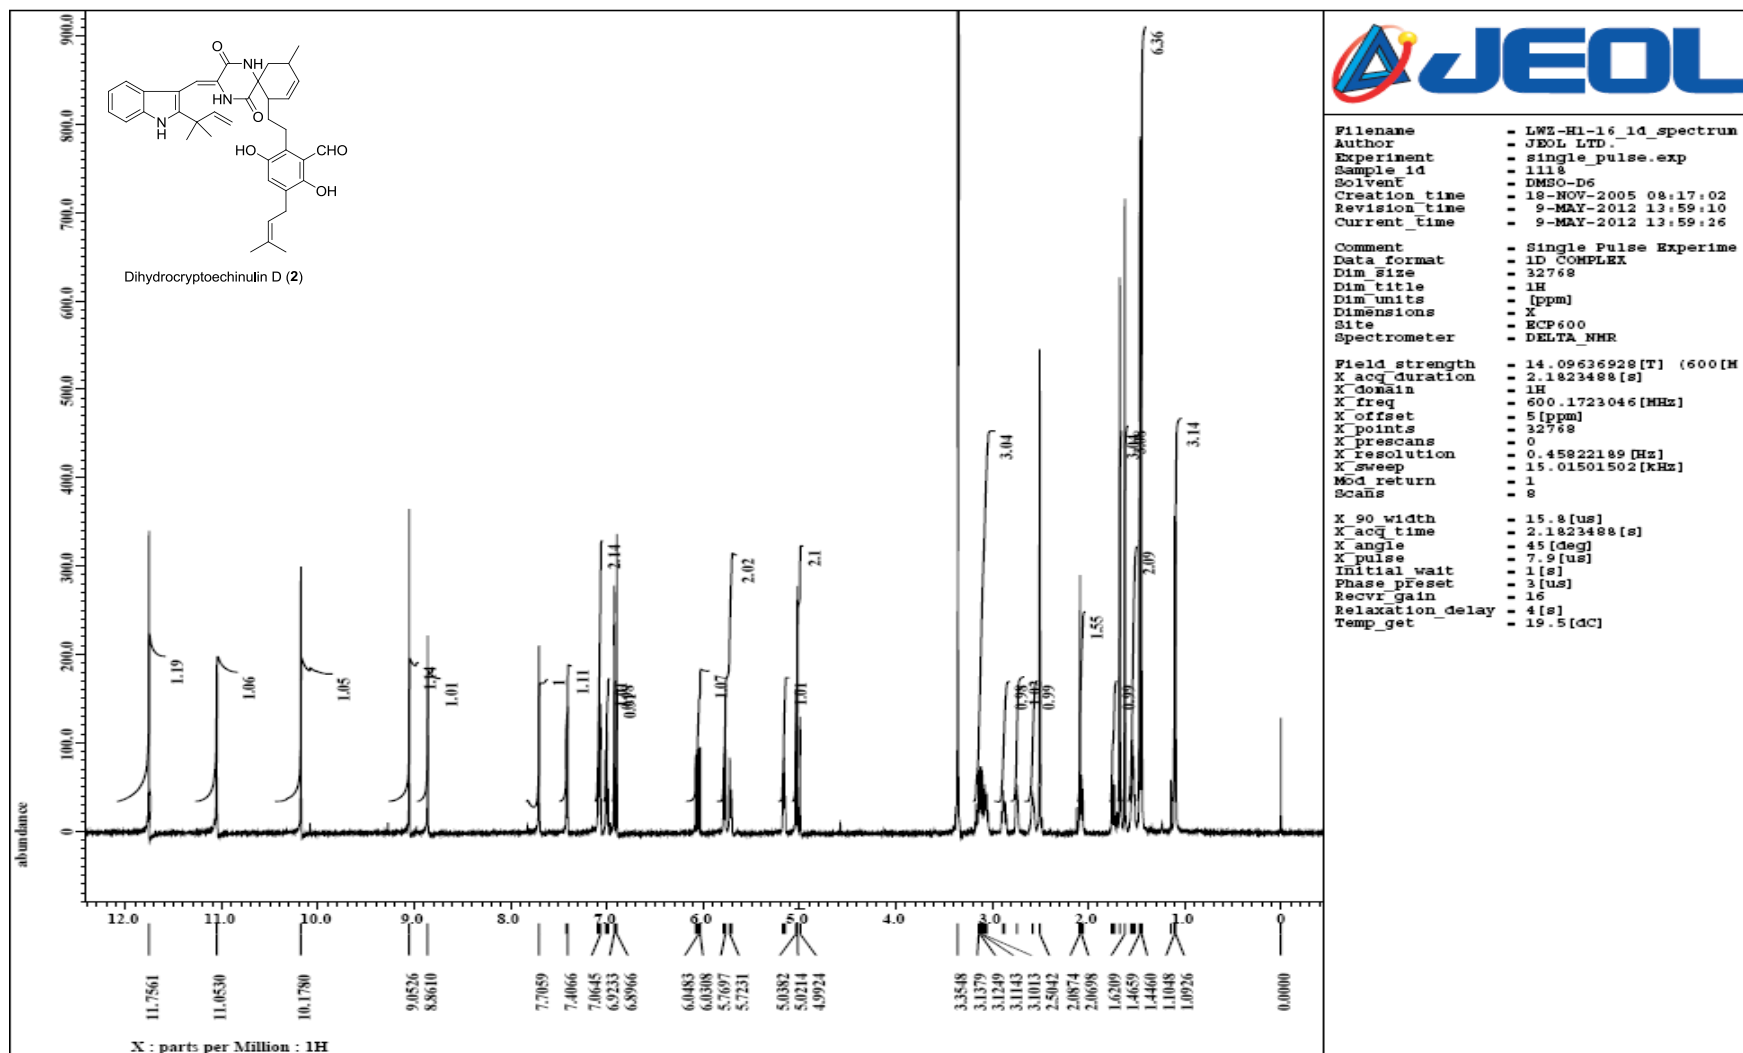

Figure S11. The  $^{13}\text{C}$ -NMR spectrum of **2** in  $\text{DMSO-}d_6$

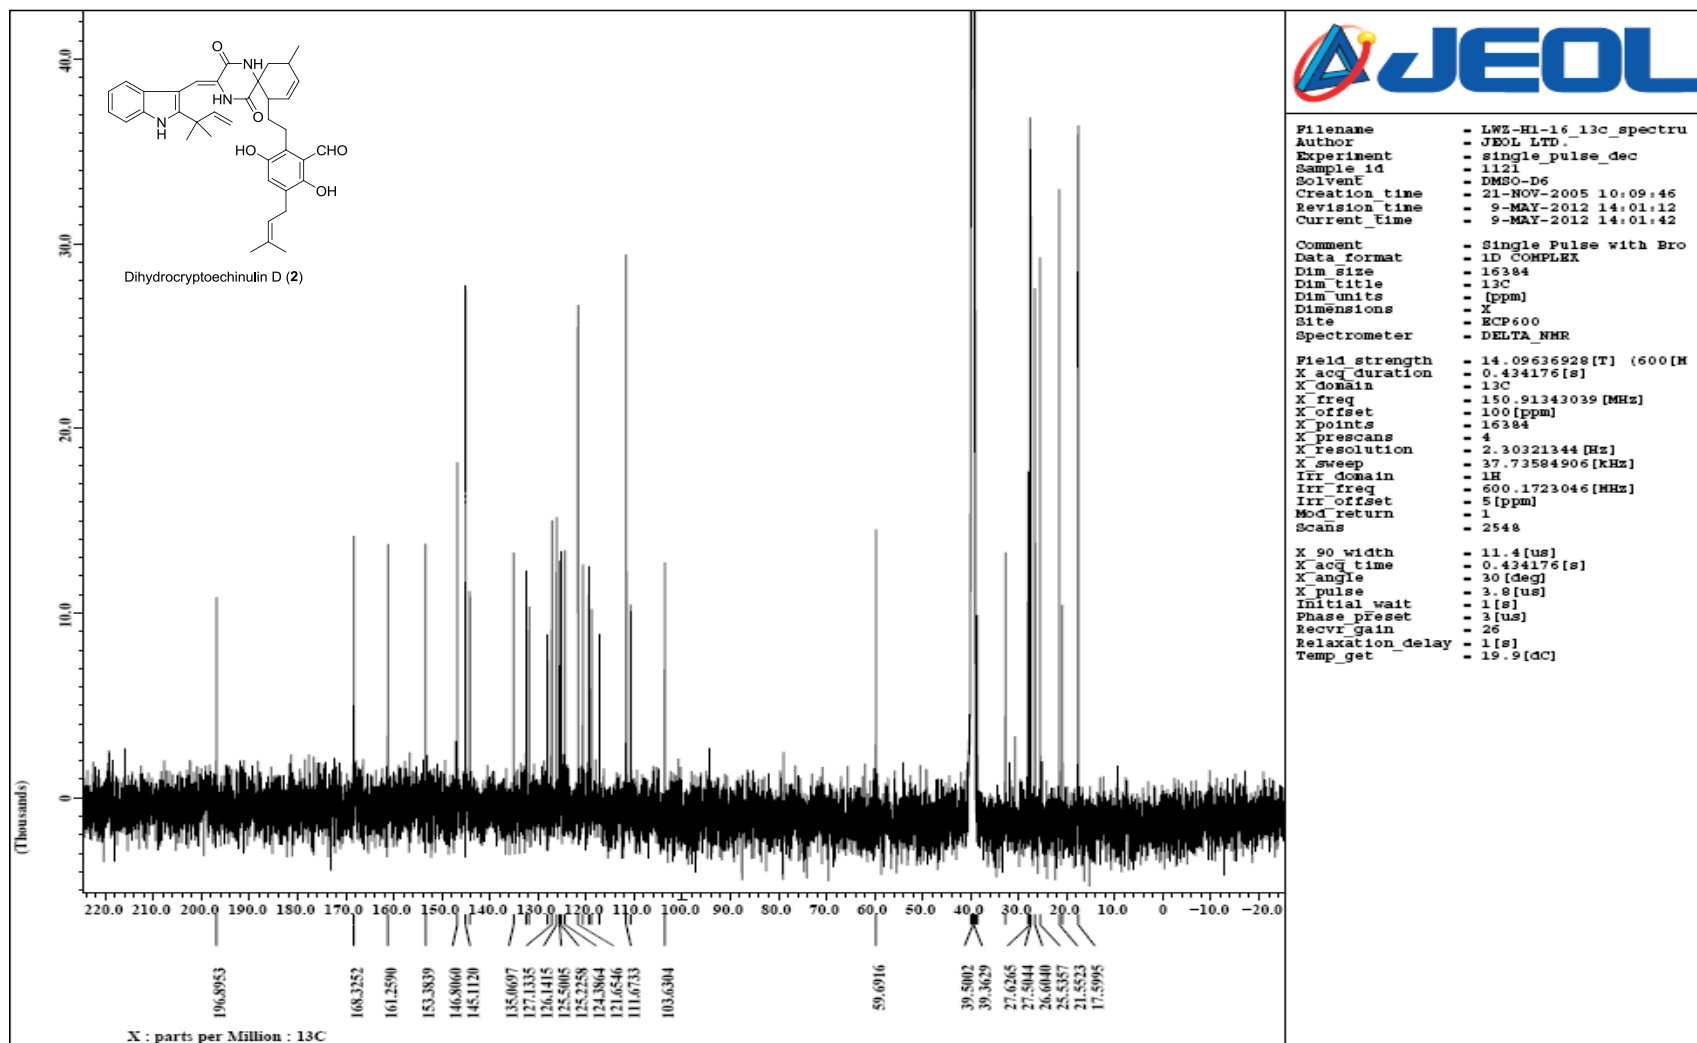

Figure S12. The DEPT spectrum of **2** in DMSO-*d*<sub>6</sub>

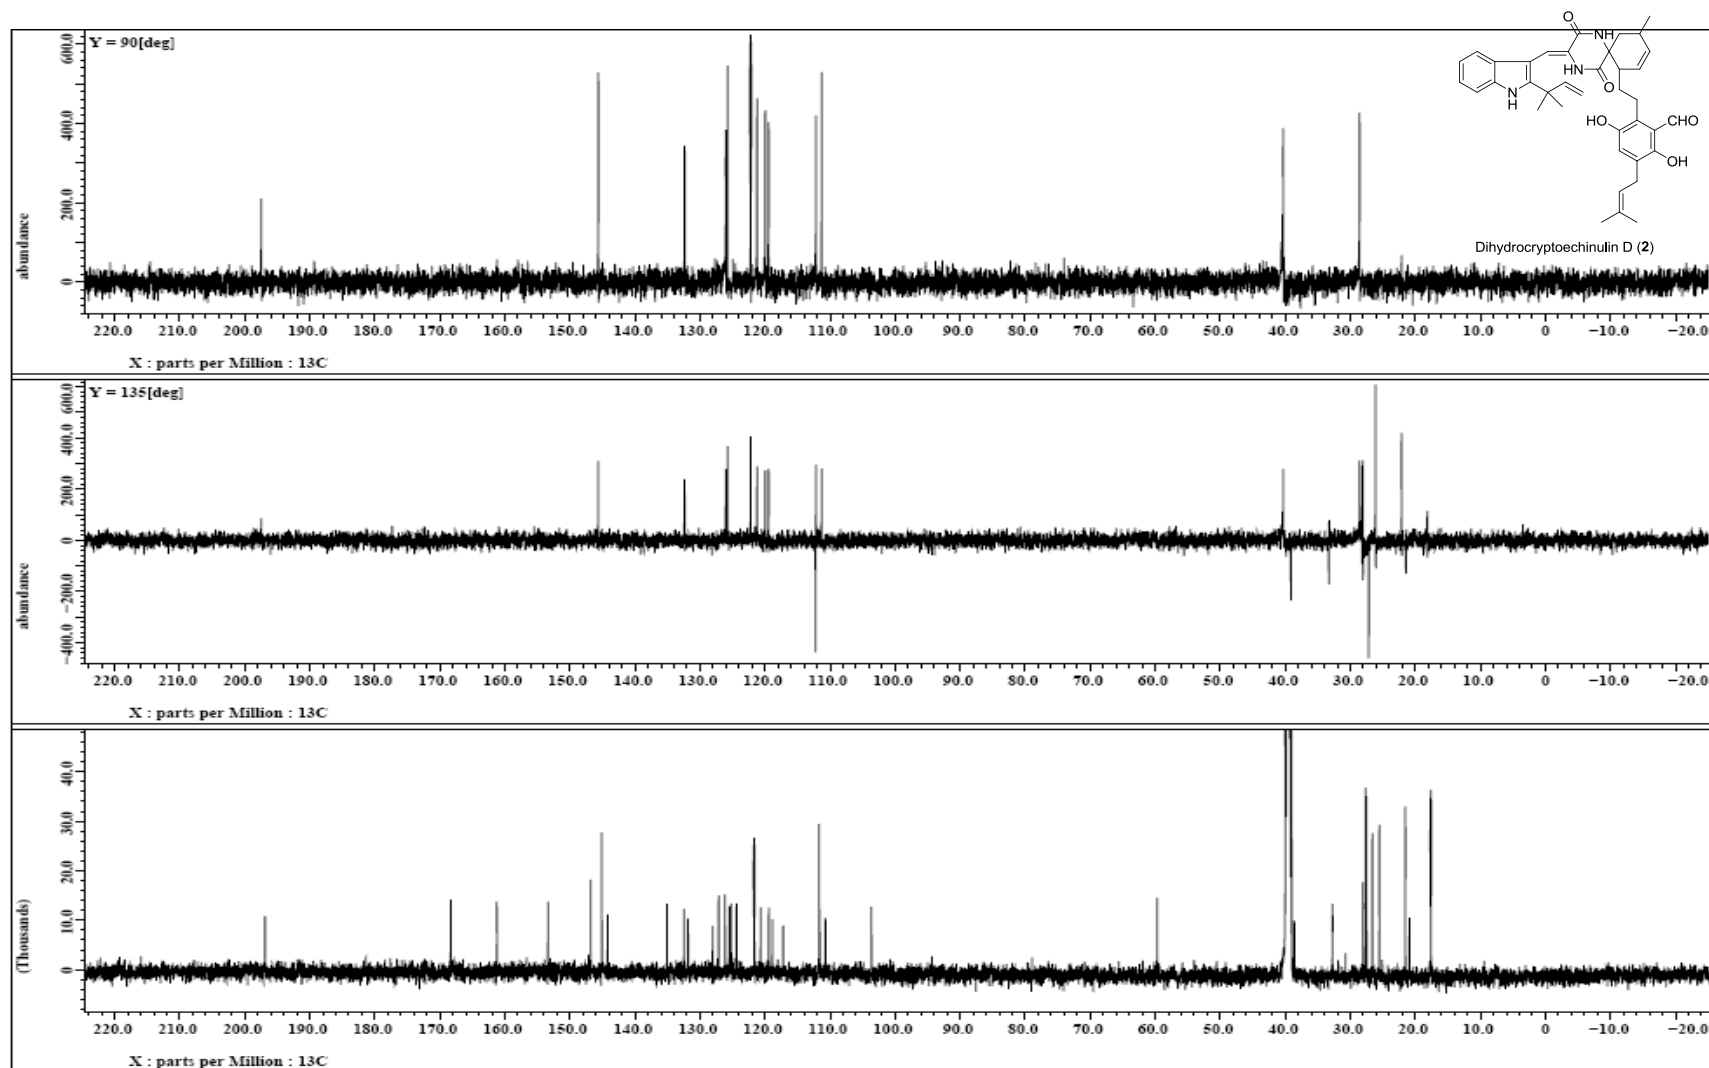

Figure S13. The HMQC spectrum of **2** in DMSO-*d*<sub>6</sub>

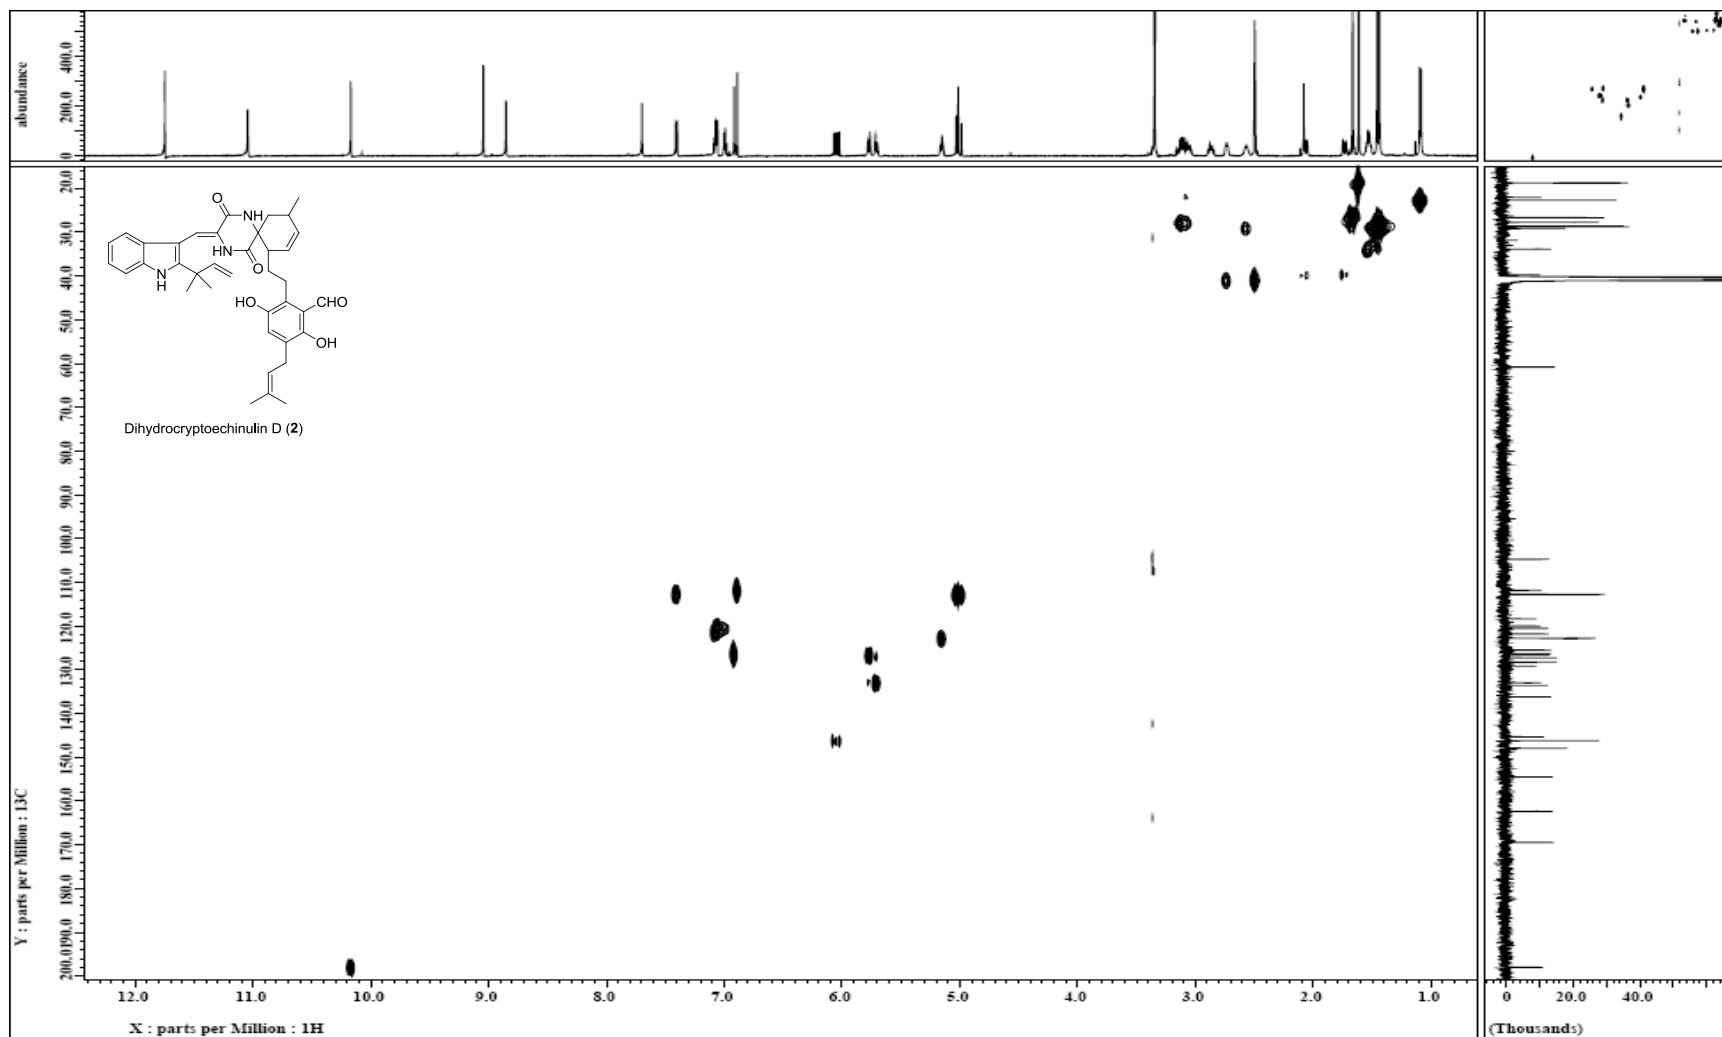

Figure S14. The  $^1\text{H}$ - $^1\text{H}$  COSY spectrum of **2** in  $\text{DMSO-}d_6$

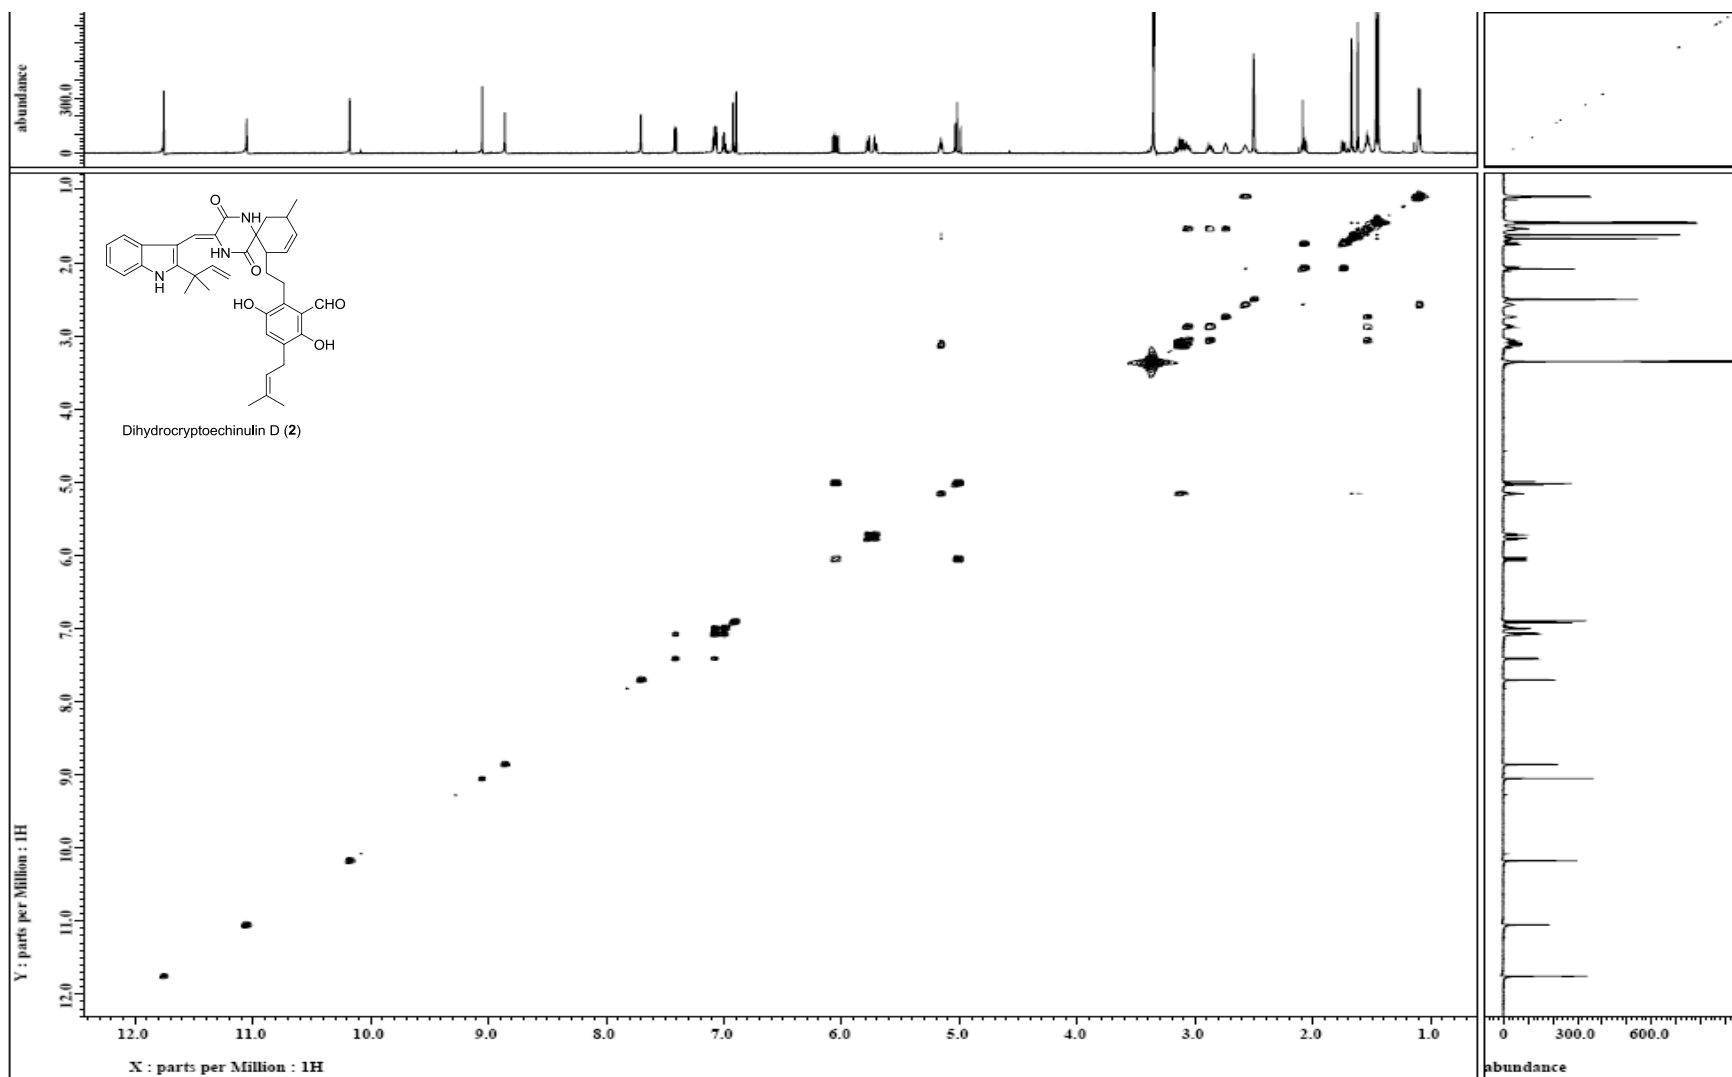



Figure S15. The HMBC spectrum of **2** in DMSO-*d*<sub>6</sub>

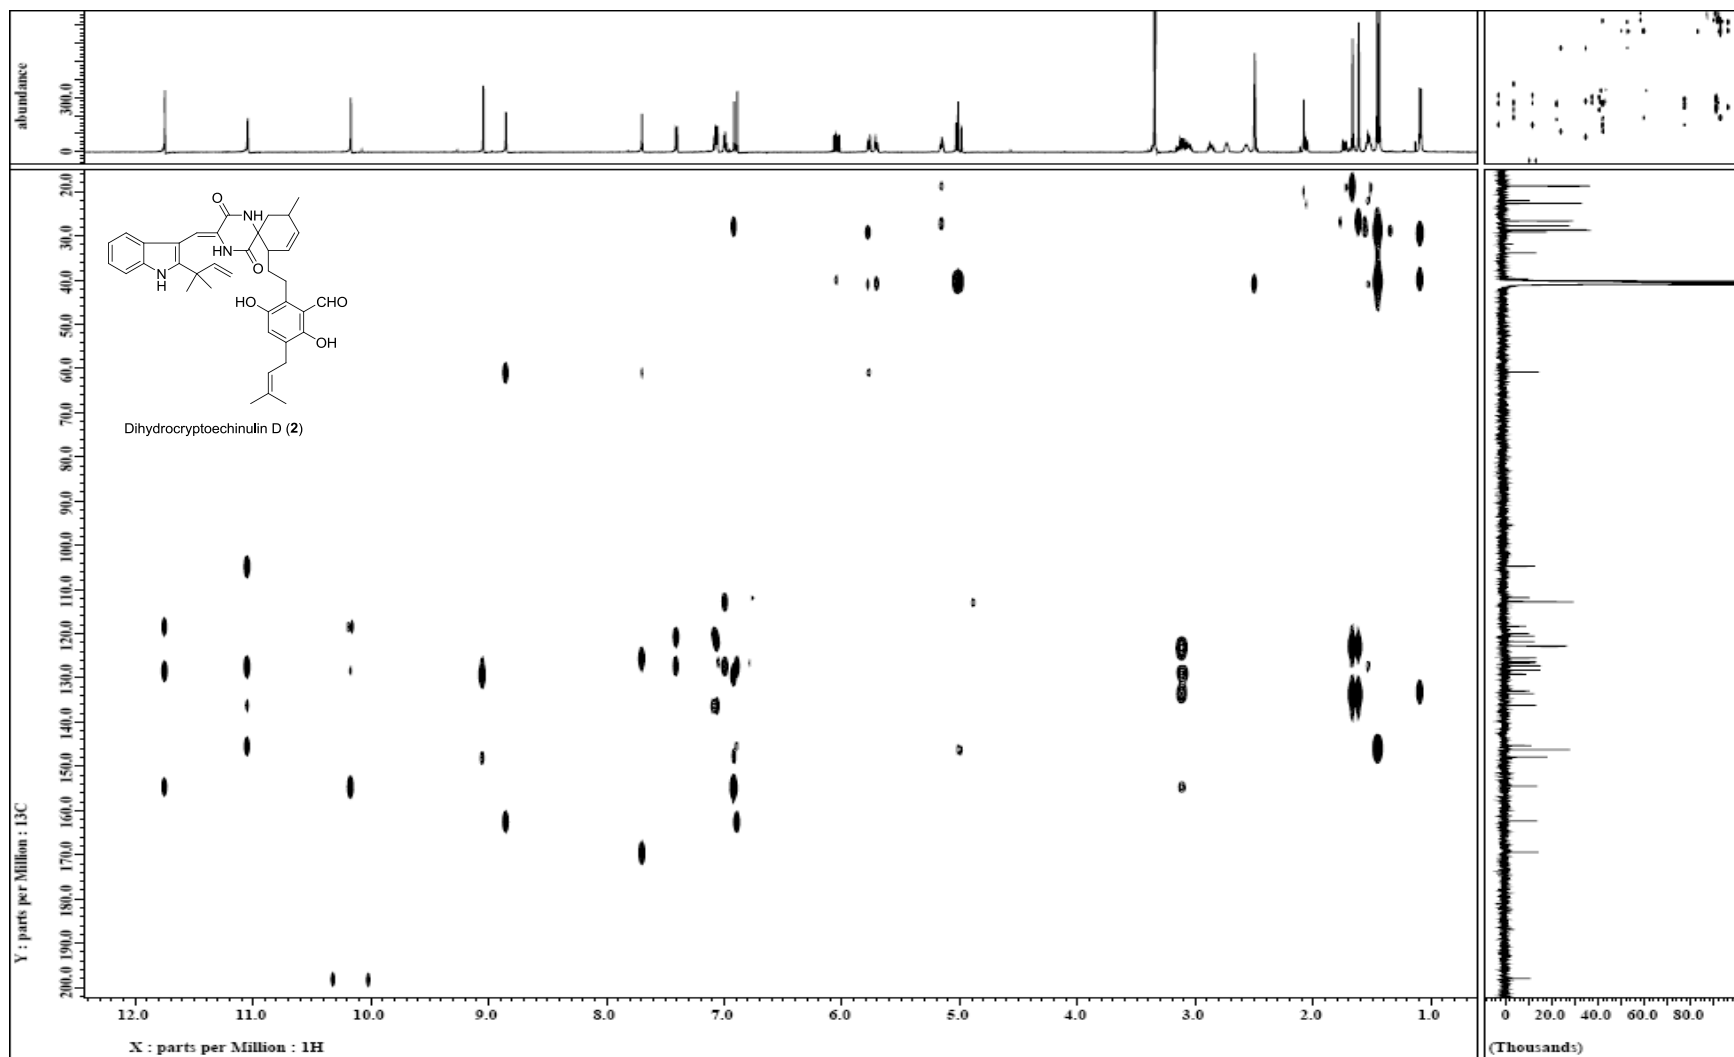

Figure S16. The NOE spectrum of **2** in DMSO-*d*<sub>6</sub>

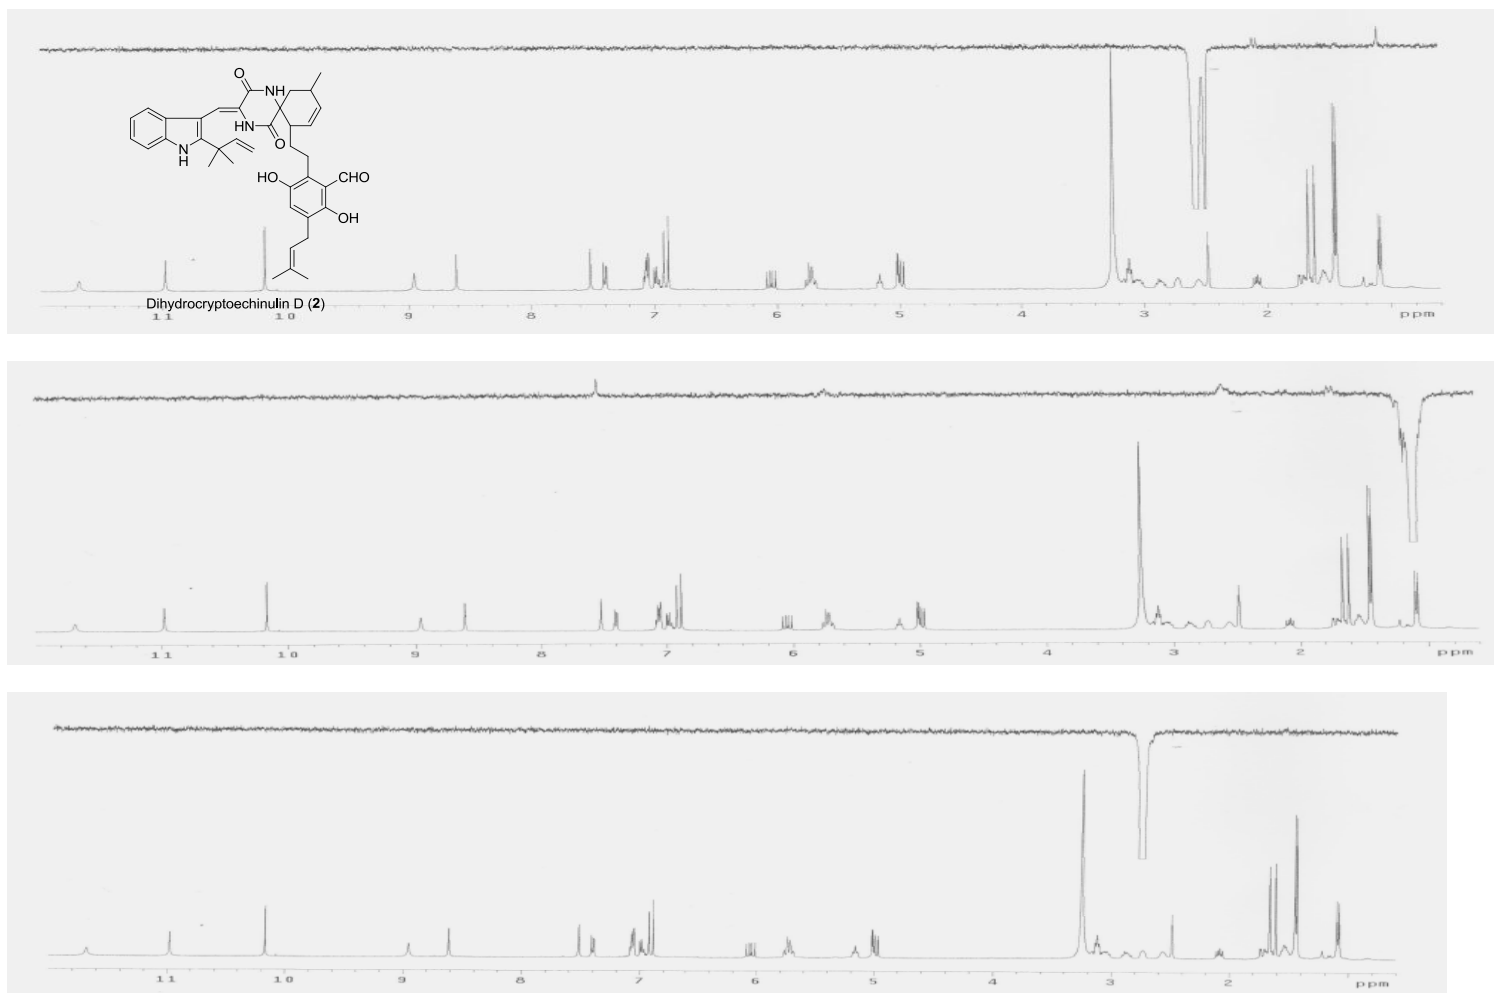

Table S1. Cartesian coordinates for the lowest energy reoptimized MMFF conformers calculated at B3LYP/6-31G(d) level of theory in vacuo.

| Compound 1<br>Conformer A |      | Standard Orientation<br>(Ångstroms) |          |          |
|---------------------------|------|-------------------------------------|----------|----------|
| I                         | Atom | X                                   | Y        | Z        |
| 1                         | C    | -4.80692                            | -3.94023 | -1.68618 |
| 2                         | C    | -5.90454                            | -3.42417 | -2.40263 |
| 3                         | C    | -6.36015                            | -2.1298  | -2.17881 |
| 4                         | C    | -5.67737                            | -1.36026 | -1.23306 |
| 5                         | C    | -4.54796                            | -1.84317 | -0.52118 |
| 6                         | C    | -4.13263                            | -3.17021 | -0.74536 |
| 7                         | N    | -5.9223                             | -0.08253 | -0.77915 |
| 8                         | C    | -5.00486                            | 0.277276 | 0.185791 |
| 9                         | C    | -4.12154                            | -0.78365 | 0.374972 |
| 10                        | C    | -5.12435                            | 1.643974 | 0.859151 |
| 11                        | C    | -3.02017                            | -0.8378  | 1.329105 |
| 12                        | C    | -1.76203                            | -1.27898 | 1.103869 |
| 13                        | N    | -1.29367                            | -1.72897 | -0.14175 |
| 14                        | C    | 0.010471                            | -1.95215 | -0.48839 |
| 15                        | C    | 1.048175                            | -1.56316 | 0.586688 |
| 16                        | N    | 0.486308                            | -1.71277 | 1.902906 |
| 17                        | C    | -0.79101                            | -1.29412 | 2.234305 |
| 18                        | C    | -5.891                              | 2.580632 | -0.06792 |
| 19                        | C    | -7.10972                            | 3.091356 | 0.119395 |
| 20                        | C    | -3.73274                            | 2.290358 | 1.080954 |
| 21                        | C    | -5.83215                            | 1.464726 | 2.221852 |
| 22                        | O    | -1.09441                            | -1.01564 | 3.386519 |
| 23                        | O    | 0.339448                            | -2.35473 | -1.59314 |
| 24                        | O    | 1.253815                            | -0.12714 | 0.366737 |
| 25                        | C    | 2.416716                            | 0.316632 | -0.24026 |
| 26                        | C    | 3.621901                            | -0.33328 | 0.013722 |
| 27                        | C    | 3.554428                            | -1.55939 | 0.882138 |
| 28                        | C    | 2.339053                            | -2.37837 | 0.439351 |
| 29                        | C    | 2.359952                            | 1.446929 | -1.06666 |
| 30                        | C    | 3.562264                            | 1.90806  | -1.60509 |
| 31                        | C    | 4.778273                            | 1.251687 | -1.38131 |
| 32                        | C    | 4.81628                             | 0.101985 | -0.56998 |
| 33                        | C    | 6.053074                            | -0.75893 | -0.4074  |
| 34                        | C    | 5.945855                            | -1.6684  | 0.841226 |
| 35                        | O    | 4.706823                            | -2.38405 | 0.772317 |
| 36                        | O    | 5.889891                            | 1.757014 | -1.98743 |
| 37                        | C    | 1.042403                            | 2.147249 | -1.34943 |
| 38                        | C    | 0.582854                            | 3.014206 | -0.19853 |
| 39                        | C    | 0.365127                            | 4.338127 | -0.18942 |
| 40                        | C    | -0.09344                            | 5.030616 | 1.073251 |
| 41                        | C    | 0.543339                            | 5.25918  | -1.37207 |
| 42                        | O    | 7.220434                            | 0.084375 | -0.35494 |
| 43                        | C    | 6.148432                            | -0.92113 | 2.160559 |
| 44                        | C    | 8.446423                            | -0.59135 | -0.61236 |
| 45                        | H    | -4.48715                            | -4.96263 | -1.86674 |
| 46                        | H    | -6.41052                            | -4.05054 | -3.13175 |
| 47                        | H    | -7.22075                            | -1.73474 | -2.71224 |
| 48                        | H    | -3.31227                            | -3.59936 | -0.17746 |
| 49                        | H    | -6.65764                            | 0.533343 | -1.09572 |
| 50                        | H    | -1.96482                            | -1.85778 | -0.89189 |
| 51                        | H    | 1.134962                            | -1.61585 | 2.678602 |
| 52                        | H    | -5.3463                             | 2.852297 | -0.97411 |
| 53                        | H    | -7.54782                            | 3.773124 | -0.60492 |
| 54                        | H    | -7.71005                            | 2.872971 | 0.998151 |
| 55                        | H    | -3.18507                            | 2.392339 | 0.138052 |
| 56                        | H    | -3.11507                            | 1.702026 | 1.762749 |
| 57                        | H    | -3.86007                            | 3.289286 | 1.512302 |
| 58                        | H    | -6.82129                            | 1.010031 | 2.10455  |
| 59                        | H    | -5.24309                            | 0.812036 | 2.873143 |

|    |   |          |          |          |
|----|---|----------|----------|----------|
| 60 | H | -5.95051 | 2.430861 | 2.725114 |
| 61 | H | 3.427581 | -1.25542 | 1.937264 |
| 62 | H | 2.249116 | -3.29674 | 1.026982 |
| 63 | H | 2.460414 | -2.65296 | -0.61061 |
| 64 | H | 3.573895 | 2.790157 | -2.23877 |
| 65 | H | 6.149418 | -1.41404 | -1.28961 |
| 66 | H | 6.698679 | -2.46009 | 0.76695  |
| 67 | H | 6.659041 | 1.330678 | -1.55679 |
| 68 | H | 1.142972 | 2.728207 | -2.27025 |
| 69 | H | 0.2782   | 1.380982 | -1.53734 |
| 70 | H | 0.422004 | 2.466457 | 0.729652 |
| 71 | H | -1.05562 | 5.540345 | 0.920296 |
| 72 | H | -0.20948 | 4.328788 | 1.904985 |
| 73 | H | 0.621967 | 5.806759 | 1.380738 |
| 74 | H | 1.279455 | 6.042638 | -1.14351 |
| 75 | H | -0.39695 | 5.778364 | -1.60561 |
| 76 | H | 0.874229 | 4.746704 | -2.27829 |
| 77 | H | 7.171331 | -0.53875 | 2.224041 |
| 78 | H | 5.474785 | -0.06425 | 2.258312 |
| 79 | H | 5.979566 | -1.60308 | 3.00037  |
| 80 | H | 9.21978  | 0.177285 | -0.67985 |
| 81 | H | 8.403559 | -1.14922 | -1.55882 |
| 82 | H | 8.707526 | -1.28444 | 0.197464 |
| 83 | H | -3.18898 | -0.50116 | 2.348076 |

B3LYP Energy = -1972.78752512 a.u.; E+ZPVE = -1972.098226 a.u.

| Compound 1<br>Conformer B |      | Standard Orientation<br>(Ångstroms) |          |          |
|---------------------------|------|-------------------------------------|----------|----------|
| I                         | Atom | X                                   | Y        | Z        |
| 1                         | C    | -4.33033                            | -4.20099 | -1.14649 |
| 2                         | C    | -5.52213                            | -4.03227 | -1.87799 |
| 3                         | C    | -6.22082                            | -2.83127 | -1.8372  |
| 4                         | C    | -5.68507                            | -1.79986 | -1.06142 |
| 5                         | C    | -4.46673                            | -1.92822 | -0.3445  |
| 6                         | C    | -3.80308                            | -3.1705  | -0.37666 |
| 7                         | N    | -6.17596                            | -0.53951 | -0.79907 |
| 8                         | C    | -5.33439                            | 0.146153 | 0.049984 |
| 9                         | C    | -4.24497                            | -0.67148 | 0.351907 |
| 10                        | C    | -5.72707                            | 1.54748  | 0.517337 |
| 11                        | C    | -3.14436                            | -0.34977 | 1.250892 |
| 12                        | C    | -1.8299                             | -0.62712 | 1.086677 |
| 13                        | N    | -1.28641                            | -1.21993 | -0.06384 |
| 14                        | C    | 0.033062                            | -1.4658  | -0.32497 |
| 15                        | C    | 1.047376                            | -0.94435 | 0.715807 |
| 16                        | N    | 0.41989                             | -0.71575 | 1.991228 |
| 17                        | C    | -0.88084                            | -0.29315 | 2.184702 |
| 18                        | C    | -6.72                               | 2.137488 | -0.47844 |
| 19                        | C    | -8.01354                            | 2.397839 | -0.27802 |
| 20                        | C    | -4.50538                            | 2.500829 | 0.531064 |
| 21                        | C    | -6.3211                             | 1.447534 | 1.941312 |
| 22                        | O    | -1.22598                            | 0.248381 | 3.22758  |
| 23                        | O    | 0.405235                            | -2.00519 | -1.35563 |
| 24                        | O    | 1.449197                            | 0.368629 | 0.207107 |
| 25                        | C    | 2.67036                             | 0.509625 | -0.43275 |
| 26                        | C    | 3.773359                            | -0.21014 | 0.021793 |
| 27                        | C    | 3.52818                             | -1.16786 | 1.154824 |
| 28                        | C    | 2.230381                            | -1.91872 | 0.84985  |
| 29                        | C    | 2.78709                             | 1.415521 | -1.49607 |
| 30                        | C    | 4.046575                            | 1.56148  | -2.08061 |
| 31                        | C    | 5.155765                            | 0.820479 | -1.658   |
| 32                        | C    | 5.024377                            | -0.08974 | -0.59259 |
| 33                        | C    | 6.130809                            | -1.0336  | -0.16611 |
| 34                        | C    | 5.885959                            | -1.57624 | 1.262692 |
| 35                        | O    | 4.565023                            | -2.12762 | 1.312095 |
| 36                        | O    | 6.332272                            | 1.009334 | -2.32007 |
| 37                        | C    | 1.607199                            | 2.25194  | -1.95587 |
| 38                        | C    | 1.522267                            | 3.559787 | -1.19872 |
| 39                        | C    | 0.563196                            | 3.980554 | -0.36082 |
| 40                        | C    | 0.670528                            | 5.329638 | 0.311417 |
| 41                        | C    | -0.67498                            | 3.199096 | 0.001306 |
| 42                        | O    | 7.40145                             | -0.36145 | -0.27135 |
| 43                        | C    | 6.162991                            | -0.55009 | 2.362662 |
| 44                        | C    | 8.526943                            | -1.23231 | -0.29717 |
| 45                        | H    | -3.81751                            | -5.15812 | -1.17843 |
| 46                        | H    | -5.90812                            | -4.85605 | -2.47159 |
| 47                        | H    | -7.1541                             | -2.7025  | -2.3791  |
| 48                        | H    | -2.90277                            | -3.33547 | 0.206857 |
| 49                        | H    | -7.03575                            | -0.14759 | -1.15604 |
| 50                        | H    | -1.92161                            | -1.49794 | -0.80506 |
| 51                        | H    | 1.038439                            | -0.4102  | 2.736562 |
| 52                        | H    | -6.28698                            | 2.371637 | -1.45283 |
| 53                        | H    | -8.62185                            | 2.845508 | -1.0596  |
| 54                        | H    | -8.51353                            | 2.197739 | 0.665206 |
| 55                        | H    | -4.04227                            | 2.56016  | -0.45961 |
| 56                        | H    | -3.7404                             | 2.173724 | 1.238105 |
| 57                        | H    | -4.82966                            | 3.506811 | 0.819215 |
| 58                        | H    | -7.18719                            | 0.778192 | 1.96924  |
| 59                        | H    | -5.57572                            | 1.053414 | 2.638466 |
| 60                        | H    | -6.63264                            | 2.435285 | 2.298855 |
| 61                        | H    | 3.413929                            | -0.60205 | 2.097418 |
| 62                        | H    | 2.002862                            | -2.64592 | 1.634649 |

|    |   |          |          |          |
|----|---|----------|----------|----------|
| 63 | H | 2.353548 | -2.45315 | -0.0944  |
| 64 | H | 4.188018 | 2.256292 | -2.90387 |
| 65 | H | 6.147696 | -1.89735 | -0.852   |
| 66 | H | 6.529343 | -2.44725 | 1.42521  |
| 67 | H | 7.0303   | 0.60326  | -1.76627 |
| 68 | H | 1.734151 | 2.467558 | -3.02558 |
| 69 | H | 0.686753 | 1.673539 | -1.85322 |
| 70 | H | 2.376877 | 4.219063 | -1.35838 |
| 71 | H | 0.673774 | 5.225635 | 1.405747 |
| 72 | H | 1.580911 | 5.862028 | 0.018288 |
| 73 | H | -0.19083 | 5.966361 | 0.06347  |
| 74 | H | -1.58002 | 3.758275 | -0.27568 |
| 75 | H | -0.72665 | 3.041858 | 1.08753  |
| 76 | H | -0.72032 | 2.218137 | -0.47432 |
| 77 | H | 7.225995 | -0.29228 | 2.378752 |
| 78 | H | 5.60524  | 0.378989 | 2.210546 |
| 79 | H | 5.892408 | -0.97129 | 3.336435 |
| 80 | H | 9.39888  | -0.61106 | -0.51448 |
| 81 | H | 8.421253 | -1.99814 | -1.07897 |
| 82 | H | 8.679769 | -1.72946 | 0.669215 |
| 83 | H | -3.36307 | 0.160071 | 2.184539 |

B3LYP Energy = -1972.78684810 a.u.; E+ZPVE = -1972.097518 a.u.

| Compound 2<br>Conformer A |      | Standard Orientation<br>(Ångstroms) |          |          |
|---------------------------|------|-------------------------------------|----------|----------|
| I                         | Atom | X                                   | Y        | Z        |
| 1                         | C    | 4.300187                            | -3.83098 | -1.37838 |
| 2                         | C    | 5.295196                            | -3.82587 | -2.37594 |
| 3                         | C    | 6.138156                            | -2.73306 | -2.54018 |
| 4                         | C    | 5.946331                            | -1.63843 | -1.69234 |
| 5                         | C    | 4.936978                            | -1.60645 | -0.6961  |
| 6                         | C    | 4.118948                            | -2.74118 | -0.53524 |
| 7                         | N    | 6.641382                            | -0.45316 | -1.59769 |
| 8                         | C    | 6.140561                            | 0.331102 | -0.57866 |
| 9                         | C    | 5.060951                            | -0.33689 | 0.000818 |
| 10                        | C    | 6.730779                            | 1.730183 | -0.4042  |
| 11                        | C    | 4.21522                             | 0.139925 | 1.088082 |
| 12                        | C    | 2.867291                            | 0.081518 | 1.166928 |
| 13                        | N    | 2.041369                            | -0.38569 | 0.125701 |
| 14                        | C    | 0.695664                            | -0.57142 | 0.165309 |
| 15                        | C    | 0.005896                            | -0.33783 | 1.5117   |
| 16                        | N    | 0.811627                            | 0.576743 | 2.32682  |
| 17                        | C    | 2.178532                            | 0.643775 | 2.364659 |
| 18                        | C    | 8.223905                            | 1.647954 | -0.70549 |
| 19                        | C    | 8.88077                             | 2.224819 | -1.71416 |
| 20                        | C    | 6.598838                            | 2.260568 | 1.043343 |
| 21                        | C    | 5.991724                            | 2.69601  | -1.35993 |
| 22                        | O    | 2.782825                            | 1.177827 | 3.29014  |
| 23                        | O    | 0.086339                            | -0.97426 | -0.82922 |
| 24                        | C    | -1.41168                            | 0.273403 | 1.311316 |
| 25                        | C    | -2.12472                            | 0.283642 | 2.651301 |
| 26                        | C    | -1.86351                            | -0.57071 | 3.646457 |
| 27                        | C    | -0.83969                            | -1.67931 | 3.577245 |
| 28                        | C    | -0.14591                            | -1.73211 | 2.192226 |
| 29                        | C    | -1.39872                            | 1.66464  | 0.620456 |
| 30                        | C    | -1.79926                            | 1.66491  | -0.87678 |
| 31                        | C    | -3.21798                            | 1.201066 | -1.15983 |
| 32                        | C    | -3.47485                            | -0.1048  | -1.58227 |
| 33                        | C    | -4.79695                            | -0.51121 | -1.86267 |
| 34                        | C    | -5.89081                            | 0.323913 | -1.72842 |
| 35                        | C    | -5.65775                            | 1.642269 | -1.28311 |
| 36                        | C    | -4.33702                            | 2.084637 | -1.00321 |
| 37                        | C    | -7.30369                            | -0.14756 | -2.02455 |
| 38                        | C    | -8.0825                             | -0.46573 | -0.76767 |
| 39                        | C    | -8.60346                            | -1.64227 | -0.38802 |
| 40                        | C    | -9.35741                            | -1.76009 | 0.916541 |
| 41                        | C    | -8.51424                            | -2.92989 | -1.17081 |
| 42                        | C    | 0.148772                            | -1.62727 | 4.76207  |
| 43                        | O    | -6.72801                            | 2.448798 | -1.14684 |
| 44                        | O    | -2.53789                            | -1.07668 | -1.78241 |
| 45                        | C    | -4.16104                            | 3.462752 | -0.57612 |
| 46                        | O    | -5.08002                            | 4.279856 | -0.41332 |
| 47                        | H    | 3.667285                            | -4.70634 | -1.26344 |
| 48                        | H    | 5.411568                            | -4.69254 | -3.02033 |
| 49                        | H    | 6.919412                            | -2.73135 | -3.29562 |
| 50                        | H    | 3.365016                            | -2.77425 | 0.245195 |
| 51                        | H    | 7.443567                            | -0.18626 | -2.15105 |
| 52                        | H    | 2.481664                            | -0.63092 | -0.75641 |
| 53                        | H    | 0.357517                            | 0.940843 | 3.157415 |
| 54                        | H    | 8.787484                            | 1.045848 | 0.009259 |
| 55                        | H    | 9.956884                            | 2.112854 | -1.81687 |
| 56                        | H    | 8.388546                            | 2.842838 | -2.45979 |
| 57                        | H    | 7.016151                            | 1.555604 | 1.770457 |
| 58                        | H    | 5.557785                            | 2.457762 | 1.310125 |
| 59                        | H    | 7.149311                            | 3.203035 | 1.131055 |
| 60                        | H    | 4.928692                            | 2.730754 | -1.10342 |
| 61                        | H    | 6.398615                            | 3.709859 | -1.27492 |
| 62                        | H    | 6.074052                            | 2.376183 | -2.40389 |

|    |   |          |          |          |
|----|---|----------|----------|----------|
| 63 | H | -1.95234 | -0.42527 | 0.663129 |
| 64 | H | -2.90571 | 1.031414 | 2.777989 |
| 65 | H | -2.42857 | -0.49607 | 4.575108 |
| 66 | H | -1.39247 | -2.62518 | 3.684678 |
| 67 | H | 0.843718 | -2.19517 | 2.289605 |
| 68 | H | -0.7268  | -2.35964 | 1.507305 |
| 69 | H | -2.07818 | 2.33482  | 1.160369 |
| 70 | H | -0.40172 | 2.111479 | 0.719257 |
| 71 | H | -1.65563 | 2.680099 | -1.26311 |
| 72 | H | -1.09565 | 1.047929 | -1.44163 |
| 73 | H | -4.93413 | -1.53587 | -2.19799 |
| 74 | H | -7.82821 | 0.649401 | -2.56816 |
| 75 | H | -7.25412 | -1.01242 | -2.69194 |
| 76 | H | -8.21806 | 0.388986 | -0.10606 |
| 77 | H | -9.39943 | -0.80593 | 1.450993 |
| 78 | H | -10.3889 | -2.10194 | 0.749604 |
| 79 | H | -8.88889 | -2.50168 | 1.579527 |
| 80 | H | -8.02215 | -3.7114  | -0.57483 |
| 81 | H | -9.51793 | -3.30936 | -1.40893 |
| 82 | H | -7.96443 | -2.83244 | -2.10977 |
| 83 | H | 0.793661 | -0.74341 | 4.732421 |
| 84 | H | 0.796487 | -2.51158 | 4.759456 |
| 85 | H | -0.39296 | -1.61476 | 5.715063 |
| 86 | H | -6.38692 | 3.330796 | -0.83857 |
| 87 | H | -1.65382 | -0.86283 | -1.42041 |
| 88 | H | -3.13174 | 3.807326 | -0.38554 |
| 89 | H | 4.673835 | 0.615103 | 1.947679 |

B3LYP Energy = -2014.30676863 a.u.; E+ZPVE = -2013.559702 a.u.



| Compound 2<br>Conformer B |      | Standard Orientation<br>(Ångstroms) |          |          |
|---------------------------|------|-------------------------------------|----------|----------|
| I                         | Atom | X                                   | Y        | Z        |
| 1                         | C    | -0.40799                            | -3.50404 | 0.463066 |
| 2                         | C    | -1.11584                            | -4.64738 | 0.043658 |
| 3                         | C    | -2.48815                            | -4.59962 | -0.17426 |
| 4                         | C    | -3.12948                            | -3.37341 | 0.019932 |
| 5                         | C    | -2.43698                            | -2.19674 | 0.408611 |
| 6                         | C    | -1.05327                            | -2.28806 | 0.657296 |
| 7                         | N    | -4.46395                            | -3.04226 | -0.07576 |
| 8                         | C    | -4.66088                            | -1.71345 | 0.232113 |
| 9                         | C    | -3.42549                            | -1.139   | 0.528774 |
| 10                        | C    | -6.08061                            | -1.14714 | 0.239502 |
| 11                        | C    | -3.1893                             | 0.238091 | 0.943464 |
| 12                        | C    | -2.19783                            | 1.064887 | 0.54434  |
| 13                        | N    | -1.23764                            | 0.724855 | -0.42961 |
| 14                        | C    | -0.29991                            | 1.539689 | -0.98058 |
| 15                        | C    | -0.33291                            | 3.016875 | -0.57672 |
| 16                        | N    | -1.04674                            | 3.180745 | 0.692304 |
| 17                        | C    | -2.08472                            | 2.420219 | 1.157371 |
| 18                        | C    | -6.97175                            | -2.04242 | -0.61436 |
| 19                        | C    | -7.96554                            | -2.83148 | -0.20114 |
| 20                        | C    | -6.12838                            | 0.260622 | -0.40796 |
| 21                        | C    | -6.57308                            | -1.05949 | 1.702457 |
| 22                        | O    | -2.83401                            | 2.810452 | 2.048304 |
| 23                        | O    | 0.4903                              | 1.109915 | -1.82557 |
| 24                        | C    | 1.112573                            | 3.554147 | -0.42707 |
| 25                        | C    | 1.085163                            | 5.063499 | -0.3111  |
| 26                        | C    | 0.097476                            | 5.834265 | -0.77933 |
| 27                        | C    | -1.10868                            | 5.31603  | -1.52704 |
| 28                        | C    | -1.03362                            | 3.783277 | -1.73966 |
| 29                        | C    | 1.898255                            | 2.89427  | 0.732353 |
| 30                        | C    | 3.436051                            | 2.847341 | 0.470419 |
| 31                        | C    | 3.966405                            | 1.445573 | 0.224392 |
| 32                        | C    | 3.826644                            | 0.887277 | -1.046   |
| 33                        | C    | 4.340414                            | -0.38934 | -1.32648 |
| 34                        | C    | 4.975817                            | -1.17017 | -0.37108 |
| 35                        | C    | 5.093688                            | -0.64142 | 0.929024 |
| 36                        | C    | 4.594563                            | 0.658225 | 1.23697  |
| 37                        | C    | 5.518942                            | -2.55147 | -0.69261 |
| 38                        | C    | 4.593296                            | -3.66086 | -0.24597 |
| 39                        | C    | 4.001471                            | -4.60147 | -0.99768 |
| 40                        | C    | 3.109881                            | -5.64319 | -0.36172 |
| 41                        | C    | 4.144752                            | -4.7413  | -2.49391 |
| 42                        | C    | -2.43311                            | 5.791274 | -0.89153 |
| 43                        | O    | 5.693001                            | -1.40906 | 1.858366 |
| 44                        | O    | 3.24365                             | 1.60436  | -2.0745  |
| 45                        | C    | 4.719788                            | 1.13001  | 2.606758 |
| 46                        | O    | 5.256387                            | 0.497938 | 3.527637 |
| 47                        | H    | 0.660556                            | -3.57551 | 0.644167 |
| 48                        | H    | -0.58426                            | -5.58434 | -0.09623 |
| 49                        | H    | -3.04318                            | -5.48492 | -0.47329 |
| 50                        | H    | -0.49493                            | -1.43124 | 1.022356 |
| 51                        | H    | -5.21804                            | -3.66758 | -0.32216 |
| 52                        | H    | -1.22895                            | -0.22911 | -0.77905 |
| 53                        | H    | -0.98929                            | 4.100403 | 1.115114 |
| 54                        | H    | -6.75069                            | -2.00088 | -1.68265 |
| 55                        | H    | -8.55195                            | -3.41002 | -0.91014 |
| 56                        | H    | -8.24863                            | -2.92206 | 0.843605 |
| 57                        | H    | -5.75221                            | 0.233251 | -1.43643 |
| 58                        | H    | -5.53087                            | 0.985341 | 0.149225 |
| 59                        | H    | -7.16406                            | 0.617047 | -0.43114 |
| 60                        | H    | -5.93437                            | -0.38448 | 2.279849 |
| 61                        | H    | -7.59815                            | -0.67455 | 1.741686 |
| 62                        | H    | -6.5496                             | -2.03787 | 2.193275 |

|    |   |          |          |          |
|----|---|----------|----------|----------|
| 63 | H | 1.627586 | 3.286258 | -1.3555  |
| 64 | H | 1.932608 | 5.526882 | 0.192462 |
| 65 | H | 0.149397 | 6.913936 | -0.64112 |
| 66 | H | -1.07616 | 5.769818 | -2.52966 |
| 67 | H | -2.04152 | 3.376224 | -1.88633 |
| 68 | H | -0.46387 | 3.563383 | -2.64904 |
| 69 | H | 1.690583 | 3.428815 | 1.666766 |
| 70 | H | 1.532009 | 1.874082 | 0.889253 |
| 71 | H | 3.667227 | 3.442839 | -0.41854 |
| 72 | H | 3.970422 | 3.320566 | 1.297018 |
| 73 | H | 4.230087 | -0.76069 | -2.34224 |
| 74 | H | 5.718001 | -2.60962 | -1.76643 |
| 75 | H | 6.482226 | -2.67329 | -0.18002 |
| 76 | H | 4.406447 | -3.67378 | 0.82747  |
| 77 | H | 3.03655  | -5.51168 | 0.722617 |
| 78 | H | 2.094225 | -5.60334 | -0.78196 |
| 79 | H | 3.484601 | -6.65859 | -0.55491 |
| 80 | H | 4.564803 | -5.72335 | -2.75329 |
| 81 | H | 3.162105 | -4.68658 | -2.98321 |
| 82 | H | 4.783339 | -3.97802 | -2.94441 |
| 83 | H | -2.60284 | 5.361081 | 0.100574 |
| 84 | H | -3.28327 | 5.510334 | -1.52396 |
| 85 | H | -2.44129 | 6.88274  | -0.78867 |
| 86 | H | 5.693204 | -0.89087 | 2.707759 |
| 87 | H | 2.284287 | 1.394736 | -2.10626 |
| 88 | H | 4.292515 | 2.117896 | 2.843084 |
| 89 | H | -3.85695 | 0.689645 | 1.672011 |

B3LYP Energy = -2014.30356824 a.u.; E+ZPVE = -2013.556933 a
